# Supplementary material for: Prognostic Value of Survival−Associated Splicing Factor SNRPA1 Overexpression And Its Potential Mechanism In Liver Cancer
Source: Research Square preprint supplement (doi:10.21203/rs.3.rs-509065/v1), 2021-06-02
Supplement: Supplementary file 1 [file e1b3b3c672c10ef40817fce4.xlsx]

## Sheet: uniSigExp
Supplementary Table S2. The PSI value of patients on TCGA SpliceSeq database
id	futime	fustat	ISOC2|52106|ES	C16orf13|32919|ES	VPS28|85600|RI	WWOX|37672|AT	AFMID|94692|ES	YIF1A|17008|ES	JUP|40930|AT	MTX1|8038|ES	MTA1|29647|ES	C16orf13|32921|ES	IRF3|50996|ES	CSAD|21952|ES	CRELD1|63291|ES	SLC39A14|140283|ME	FAM195B|44175|ES	CUEDC1|42625|ES	AFMID|43800|ES	MPND|46796|ES	C16orf13|32924|ES	ACYP2|53566|AT	MXI1|13079|AP	IRF3|50995|ES	C16orf13|32916|ES	DHPS|47832|ES	PPP6R2|62825|ES	TSPAN31|22724|AT	AFMID|94690|ES	ZNF706|84737|AT	ZNF706|84738|AT	NUDT22|16590|RI	YPEL5|53106|ES	H2AFY|96931|ME	MFGE8|32404|ES	CCDC90B|18085|AD	NEIL3|71227|AT	NEIL3|71226|AT	C19orf60|48491|ES	AFMID|94694|ES	SLC25A45|16828|ES	RTN4|53582|AP	ISOC2|52105|ES	C1orf85|8233|ES	NAA60|33527|RI	PGAP3|40670|ES	USF2|49098|ES	STRA13|44266|ES	ACAA1|64018|ES
TCGA-G3-A6UC	671	0	0.9987	1	0.0297	0.9772	0.898637	0.9957	0.9921	0.9886	1	1	1	0.9117	1	0.8083	1	1	0.9462	1	0.9926	0.9767	0.992	1	0.9755	0.9888	0.8769	1	0.9041	0.0364	0.9636	0.2915	0.0229	0.5886	1	0.0973	0.1543	0.8457	0.9003	0.7359	0.7626	0.9757	0.9859	0.9907	0.5271	1	0.9819	0.9168	0.9768
TCGA-XR-A8TE	925	0	0.9712	0.9749	0.0524	0.9009	0.6258	0.9892	0.9992	0.9606	0.8799	0.9377	0.9886	0.6146	0.9957	0.4137	0.989	1	0.6766	1	0.9194	0.9839	0.8595	0.9467	0.9511	0.9749	0.8852	0.9075	0.2821	0.0199	0.9801	0.8517	0.2018	0.456	0.9575	0.427	0	1	0.7247	0.1824	1	0.8969	0.6837	0.9413	0.7627	1	0.9078	0.7822	0.9839
TCGA-WX-AA44	615	0	0.9842	0.752	0.0945	0.9086	0.4953	0.9804	0.9492	0.9707	0.9193	0.7345	0.9819	0.7482	1	0.4688	0.9833	1	0.4783	0.9671	0.7236	0.9762	0.6662	0.8748	0.9102	0.9331	0.7764	0.9755	0.2398	0.0417	0.9583	0.8484	0.2792	0.616	0.934	0.4148	0.8431	0.1569	0.8658	0.1237	0.7641	0.8795	0.852	0.9801	0.5398	1	0.8116	0.4773	0.9713
TCGA-DD-A1EB	2017	0	0.9912	1	0.0189	0.9653	0.8728	0.995	0.9968	0.995	0.956	1	0.9866	0.804	0.9964	0.7794	0.9921	1	0.8787	1	1	0.9618	0.9168	0.8994	0.9776	0.9772	0.9252	1	0.6999	0.0336	0.9664	0.5416	0.1487	0.5743	0.9633	0.2538	0.0499	0.9501	0.9184	0.5539	0.9388	0.9738	0.8831	0.9658	0.6806	1	0.955	0.9263	0.9728
TCGA-CC-A7II	399	0	0.7233	0.5769	0.193	0.9636	0.0125	0.9349	0.8437	0.9266	0.7575	0.6745	0.9508	0.4511	0.9481	0.0462	0.952	1	0.4112	0.8335	0.6401	0.9261	0.5134	0.6841	0.846	0.9721	0.6279	0.8844	0.024	0.0415	0.9585	0.8038	0.2693	0.84	0.8951	0.4886	0.7028	0.2972	0.3928	0.0465	0.7243	0	0.1323	0.8621	0.3445	0.9718	0.6551	0.4159	0.9323
TCGA-DD-AAVS	1823	0	0.9507	0.9579	0.0402	0.952	0.7976	0.9828	0.9997	1	0.8822	0.8857	0.9954	0.6127	0.9814	0.7837	0.9879	1	0.7711	0.9853	0.9874	0.932	0.9166	0.971	0.9342	0.9508	0.7975	0.9842	0.6117	0.0178	0.9822	0.5447	0.1086	0.6496	0.9729	0.275	0.6432	0.3568	0.8552	0.4133	0.7658	0.8305	0.5764	0.9437	0.4961	0.9895	0.9077	0.4663	0.9419
TCGA-2Y-A9H5	555	1	0.977	1	0.0474	0.9042	0.76737	0.9796	0.9843	0.99	0.9492	1	0.9951	0.7591	1	0.6591	0.9889	1	0.8666	0.9841	0.9429	0.9453	0.824	0.9795	0.9805	0.9247	0.8565	0.9736	0.8827	0.0233	0.9767	0.7471	0.0698	0.5495	0.9684	0.3443	0.5731	0.4269	0.8266	0.2877	0.9203	0.9173	0.6977	0.9462	0.6932	0.9937	0.9256	0.929	0.9502
TCGA-GJ-A3OU	879	0	0.8468	0.9311	0.0576	0.9068	0.8192	0.9219	0.9571	0.9695	0.9279	0.8053	0.979	0.8487	0.9917	0.6656	0.9863	1	0.7894	0.9765	0.9624	0.9044	0.5405	0.7857	0.9362	0.9342	0.7921	0.9839	0.5969	0.048	0.952	0.617	0.2202	0.5727	0.9754	0.3827	0.6558	0.3442	0.8102	0.2385	0.8852	0.5262	0.2866	0.9189	0.6456	0.981	0.9045	0.5375	0.9476
TCGA-DD-A1EI	183	0	0.9455	0.9497	0.047	0.9694	0.7046	0.9941	0.9918	0.9926	0.8348	0.8806	0.9924	0.8851	0.9925	0.5645	0.9845	1	0.7089	0.9726	0.9751	0.9076	0.7975	0.8988	0.9363	0.9727	0.8725	0.9914	0.5199	0.0418	0.9582	0.6978	0.2092	0.589	0.972	0.3645	0.3172	0.6828	0.655	0.2372	0.8309	0.7498	0.5346	0.9668	0.5158	0.9789	0.8767	0.6717	0.9803
TCGA-CC-A7IK	262	1	0.9114	0.9718	0.0491	0.9731	0.3074	0.9644	0.9752	0.9636	0.9084	0.9787	0.9936	0.6606	0.9091	0.3739	0.9554	1	0.3811	0.96	0.9314	0.9622	0.9544	0.9445	0.9112	0.929	0.6984	0.9637	0.0604	0.0984	0.9016	0.7894	0.4694	0.7338	0.966	0.1537	0.8186	0.1814	0.8966	0.1178	0.2431	0.722	0.499	0.9189	0.4965	0.9668	0.7676	0.6568	0.8593
TCGA-DD-AACA	2301	0	0.9631	0.9859	0.0378	0.9795	0.7551	0.9851	0.9883	0.9773	0.9081	0.9561	1	0.7904	0.9951	0.6761	0.9876	1	0.7573	0.9894	0.9278	0.9692	0.9684	1	0.9775	0.951	0.898	0.9806	0.5861	0.0252	0.9748	0.5135	0.0882	0.4685	0.9643	0.2345	0.7665	0.2335	0.9329	0.3295	0.8559	0.9083	0.6695	0.9765	0.7859	0.995	0.8445	0.8667	0.9845
TCGA-2Y-A9HB	260	0	0.9811	0.9854	0.0407	0.9583	0.7475	0.9929	0.9976	0.9813	0.9739	0.9692	0.9964	0.7485	1	0.807	0.9902	1	0.6979	0.9967	0.9645	0.9914	0.9372	0.9815	0.9465	0.9625	0.8025	0.9751	0.5797	0.0204	0.9796	0.4297	0.0668	0.5775	0.9825	0.1774	0.3699	0.6301	0.9234	0.2927	0.7357	0.9497	0.6852	0.9283	0.7337	0.9883	0.9153	0.8178	0.966
TCGA-BC-A69H	444	0	0.664	0.4098	0.105	0.8014	0.126	0.9412	0.9648	0.9513	0.7402	0.4814	0.9687	0.8734	0.9874	0.444086	0.9614	1	0.3698	0.941	0.6905	0.8503	0.83244	0.4436	0.5925	0.8084	0.5274	0.9075	0.0539	0.0695	0.9305	0.7671	0.172	0.7942	0.8816	0.5556	0.8868	0.1132	0.5395	0.0437	0.6761	0.6788	0.1071	0.8889	0.3954	0.9784	0.764	0.3129	0.9014
TCGA-DD-AAE3	566	0	0.9853	0.9815	0.0379	0.8706	0.9183	0.9991	0.9944	0.9913	0.8636	0.9636	0.9924	0.7213	1	0.7	0.9933	1	0.8476	0.9978	0.9615	0.9879	0.9334	0.9215	0.9775	0.9675	0.835	0.988	0.7378	0.0555	0.9445	0.3961	0.0736	0.4963	0.9675	0.2108	0.221	0.779	0.8633	0.8003	1	0.969	0.8489	0.9532	0.5795	1	0.8177	0.7921	0.9843
TCGA-DD-A4NS	2456	1	0.9845	0.9861	0.0546	0.9447	0.8543	0.9876	0.9264	1	0.844	0.9619	1	0.8395	0.9908	0.6936	0.9961	1	0.8339	0.9891	0.9522	0.9414	0.9076	1	0.957	0.9598	0.769	0.9463	0.551	0.0235	0.9765	0.5465	0.1125	0.5997	0.9897	0.3586	0.4002	0.5998	0.9406	0.4924	0.9101	0.7863	0.7743	0.98	0.6152	1	0.9508	0.7944	0.974
TCGA-WX-AA46	756	0	0.9914	1	0.021	0.969	0.8973	0.9926	0.9978	1	1	1	1	0.8164	0.9777	0.8172	0.9857	1	0.8701	0.9939	0.9818	0.9843	0.9647	1	0.9553	0.9882	0.8998	0.9886	0.7009	0.0457	0.9543	0.5467	0.1452	0.5357	0.9565	0.2047	0.0381	0.9619	0.8948	0.3467	0.8057	0.9658	0.8316	0.9943	0.5968	1	0.9358	0.8069	0.9825
TCGA-UB-AA0V	314	0	0.9975	0.9895	0.0164	0.9639	0.899	0.9977	0.9816	0.9878	1	0.9789	1	0.79	0.9792	0.7714	0.9866	1	0.8714	1	0.9822	0.9897	0.9306	1	0.9909	0.9857	0.827	1	0.6875	0.0325	0.9675	0.6721	0.0688	0.5763	0.9591	0.3081	0.1755	0.8245	0.8649	0.3874	0.7134	0.9533	0.9639	0.9631	0.6893	0.9838	0.9231	0.8485	0.9844
TCGA-QA-A7B7	94	0	0.6456	0.5722	0.0836	0.9417	0.1277	0.9236	0.9822	0.9243	0.8727	0.5515	0.9826	0.6038	0.9814	0.6549	0.9602	1	0.3825	0.9269	0.6088	0.9888	0.7977	0.8921	0.9049	0.947	0.8709	0.881	0.0786	0.1764	0.8236	0.5641	0.2157	0.4329	0.9303	0.4373	0.6073	0.3927	0.6181	0.084	0.2492	0.9589	0.1366	0.8967	0.7002	0.9847	0.6341	0.3272	0.9392
TCGA-5C-A9VG	328	0	0.9588	0.9586	0.0505	0.9613	0.595	0.9894	0.9926	0.9856	0.9463	0.9409	1	0.666	0.9865	0.6	0.9817	1	0.6987	0.9904	0.8943	0.9843	0.7724	1	0.9698	0.979	0.8416	0.8954	0.4616	0.0398	0.9602	0.4462	0.0504	0.7613	0.9736	0.3084	0.4694	0.5306	0.9449	0.2514	1	0.8944	0.5619	0.9446	0.2011	1	0.9216	0.6359	0.9679
TCGA-DD-AACP	415	0	0.7773	0.9033	0.0624	0.7742	0.7948	0.975	0.9851	0.9608	0.7639	0.6885	0.9946	0.6016	0.9778	0.5496	0.9812	1	0.7745	0.9305	0.8054	0.9258	0.7073	0.9432	0.959	0.9577	0.7466	0.9414	0.6144	0.0522	0.9478	0.5886	0.1255	0.8183	0.9243	0.2143	0.7996	0.2004	0.826	0.3821	1	0.5099	0.2548	0.9192	0.3695	0.9897	0.7909	0.6325	0.9533
TCGA-K7-A6G5	512	0	0.9889	0.9823	0.0316	0.9606	0.7159	0.9954	0.9945	1	0.8507	0.9577	0.9907	0.8164	1	0.6914	0.989	1	0.7883	0.996	0.9772	0.9704	0.9415	0.8977	0.9238	0.9565	0.757	0.9812	0.493	0.0453	0.9547	0.6594	0.0802	0.6439	0.9825	0.449	0.4892	0.5108	0.8276	0.0401	0.6847	0.8935	0.844	0.9712	0.5911	0.9888	0.8782	0.7819	0.9859
TCGA-DD-AACY	1450	0	0.9569	0.9697	0.0383	0.9767	0.3158	0.9767	0.9987	0.977	0.8986	0.9493	1	0.4328	0.9416	0.663	0.9789	1	0.4878	1	0.9767	0.96	0.9729	1	0.9245	0.9154	0.7662	0.982	0.1474	0.0423	0.9577	0.6153	0.1639	0.681	0.9808	0.1015	0.1158	0.8842	0.9463	0.2042	0.7471	0.9059	0.6217	0.9454	0.4666	0.9909	0.8796	0.5647	0.9443
TCGA-G3-A7M6	632	0	0.8969	0.7745	0.1375	0.8641	0.6939	0.9611	0.9968	0.9586	0.8462	0.6363	0.9901	0.6217	0.9774	0.5288	0.9857	1	0.77	0.9451	0.7982	0.8688	0.8639	0.9454	0.8463	0.9391	0.854	0.981	0.4779	0.1084	0.8916	0.7573	0.1355	0.6489	0.9638	0.419	0.7937	0.2063	0.7524	0.4436	0.8199	0.5792	0.2751	0.9232	0.7742	0.9659	0.8073	0.4177	0.9623
TCGA-BC-A10X	770	1	0.9924	0.9945	0.0253	0.9256	0.8498	0.9914	0.9895	0.9877	0.8913	0.9869	0.9936	0.8474	0.9918	0.7783	0.9861	1	0.8863	0.9964	0.995	0.9852	0.9607	0.9481	0.9625	0.9691	0.8661	1	0.6889	0.0447	0.9553	0.6516	0.1248	0.5841	0.9759	0.2193	0.2054	0.7946	0.7367	0.29	1	0.9795	0.9136	0.9635	0.7863	1	0.8883	0.8186	0.9807
TCGA-BC-A10R	308	1	0.9665	0.9789	0.0478	0.9354	0.7503	0.9935	0.9928	1	0.9392	0.8516	0.9832	0.8216	1	0.715	0.9973	0.9045	0.7297	0.9898	0.955	0.9918	0.8891	0.8597	0.9689	0.9253	0.8285	0.9484	0.533	0.0715	0.9285	0.7263	0.059	0.58	0.9657	0.3102	0.1871	0.8129	0.8199	0.2116	0.711	0.9659	0.5863	0.9722	0.4434	0.9903	0.9444	0.6718	0.9843
TCGA-CC-A7IJ	382	0	0.7536	0.8083	0.1252	0.6908	0.1657	0.8542	0.7885	0.9422	0.7741	0.6943	0.9724	0.5033	0.9844	0.026	0.9644	0.9872	0.4623	0.8374	0.6427	0.9796	0.3889	0.8107	0.9405	0.8971	0.7129	0.8317	0.0429	0.0299	0.9701	0.6779	0.1488	0.5231	0.93	0.4331	0.9166	0.0834	0.5984	0.0952	1	0.0088	0.2954	0.8984	0.608	0.8793	0.8018	0.3504	0.9673
TCGA-CC-A5UD	304	1	0.7856	0.9401	0.1489	0.9138	0.3588	0.9445	0.904	0.9365	0.9661	0.9319	0.9702	0.5087	0.9662	0.3505	0.9717	1	0.3943	1	0.9184	0.9511	0.4736	0.8495	0.9217	0.8049	0.7259	0.8427	0.1819	0.0377	0.9623	0.7291	0.1113	0.7327	0.9419	0.5099	0.2673	0.7327	0.5979	0.209	0.6385	0.6968	0.2743	0.6541	0.8458	0.9844	0.8762	0.514	0.8459
TCGA-G3-AAV6	65	1	0.7965	0.8484	0.0966	0.4549	0.1361	0.9228	0.9952	0.9495	0.8132	0.5794	0.9869	0.6053	0.9735	0.3846	0.9787	1	0.4528	0.9068	0.8835	0.5857	0.7308	0.8947	0.8515	0.9542	0.5432	0.9286	0.0162	0.0263	0.9737	0.7623	0.2857	0.8355	0.9227	0.409	0.8595	0.1405	0.7653	0.0666	0.9161	0.6398	0.3342	0.8876	0.3121	0.9792	0.7647	0.2829	0.9673
TCGA-G3-A7M8	430	0	0.9946	1	0.0183	0.978	0.8578	0.9975	0.9913	0.994	0.9084	1	0.9922	0.823	1	0.7608	0.9826	1	0.9257	1	0.9944	0.9929	0.9929	0.9619	0.9358	0.974	0.8693	0.9303	0.6223	0.0344	0.9656	0.6709	0.1446	0.6354	0.9727	0.2244	0.4726	0.5274	1	0.223	0.9403	0.9149	0.8741	0.9574	0.7681	1	0.9012	0.7902	0.9847
TCGA-DD-A4NF	428	0	0.9936	0.9906	0.0247	0.9901	0.7713	0.9909	0.9973	0.9947	0.958	0.984	0.9935	0.8127	1	0.4808	0.9805	1	0.8328	1	0.9923	0.9938	0.8682	0.9711	0.9464	0.9581	0.9509	0.9514	0.5089	0.0651	0.9349	0.5621	0.05	0.7372	0.9816	0.2622	0.1266	0.8734	0.7818	0.2193	0.728	0.9017	0.9134	0.9894	0.6436	1	0.9656	0.7342	0.994
TCGA-BD-A2L6	1363	0	0.9873	0.9628	0.0316	0.9709	0.8772	0.994	0.9962	0.9934	0.915	0.9738	0.9896	0.8505	0.9915	0.852	0.9969	1	0.7891	0.9959	0.984	0.9545	0.9505	0.9298	0.8331	0.954	0.864	0.9813	0.7265	0.0384	0.9616	0.6294	0.1691	0.5997	0.9786	0.2817	0.7986	0.2014	0.9221	0.5715	0.8448	0.9689	0.8215	0.9689	0.5053	1	0.8313	0.7687	0.9808
TCGA-CC-A3M9	300	1	0.5387	0.6279	0.1642	0.5136	0.3091	0.9243	0.9567	0.9542	0.754	0.4325	0.9794	0.5641	0.9959	0.0217	0.9695	1	0.6692	0.9528	0.7785	0.9303	0.4832	0.8176	0.8818	0.931	0.5542	0.8028	0.469	0.0158	0.9842	0.777	0.3915	0.7142	0.8765	0.521	0.775	0.225	0.6156	0.1772	0.8012	0.0179	0.1207	0.8438	0.781	0.8911	0.746	0.5111	0.9283
TCGA-DD-A39V	643	1	0.5572	0.5348	0.0693	0.8296	0.1787	0.9501	0.9984	0.9234	0.72708	0.2343	0.9469	0.69171	1	0.43966	0.9717	1	0.2124	0.8943	0.8116	0.9539	0.678467	0.1579	0.8111	0.922	0.5101	0.9611	0.468687	0.0481	0.9519	0.7483	0.1451	0.6744	1	0.113	0.7883	0.2117	0.2957	0.1314	0.74932	0.8402	0.1019	1	0.3245	1	0.5491	0.4145	0.9499
TCGA-2Y-A9GS	724	1	0.966	0.8414	0.0915	0.9614	0.4634	0.9511	0.9626	0.9739	0.5587	0.8348	0.9851	0.6922	0.9946	0.7215	0.962	1	0.3513	0.958	0.7655	0.9203	0.9379	0.8879	0.8563	0.956	0.7245	0.9492	0.1518	0.1013	0.8987	0.5814	0.27	0.7691	0.9658	0.2764	0.8848	0.1152	0.7264	0.127	0.7268	0.738	0.7564	0.9165	0.4503	0.9936	0.7509	0.3777	0.9531
TCGA-DD-AAEK	1067	0	0.9787	0.9509	0.0535	0.9741	0.8927	0.9671	1	0.9928	0.9447	0.8951	0.9902	0.8859	0.9879	0.6346	1	1	0.8748	0.9851	0.9689	0.994	0.8582	0.9547	0.944	0.9525	0.8036	0.9716	0.6963	0.0107	0.9893	0.7269	0.1842	0.6088	0.9772	0.2699	0.3862	0.6138	0.7689	0.1876	1	0.9069	0.8126	0.9933	0.6588	1	0.8712	0.8657	0.9857
TCGA-2Y-A9GX	2442	0	0.9733	0.9123	0.0387	0.9836	0.8992	0.9833	0.9705	0.9951	0.9344	0.7751	0.9904	0.7896	1	0.7376	0.9866	1	0.6446	0.9848	0.9222	0.961	0.9382	0.9465	0.9575	0.9394	0.8748	0.9677	0.6591	0.0703	0.9297	0.7362	0.0686	0.5097	0.9533	0.2825	0.5755	0.4245	0.9695	0.5468	0.8698	0.8803	0.6501	0.9801	0.5954	0.983	0.9238	0.7348	0.9473
TCGA-DD-A1EA	2415	0	0.9866	0.9851	0.0517	0.9201	0.6581	0.9618	0.9973	0.9905	0.984	0.977	1	0.827	0.9892	0.6499	0.9929	1	0.6957	1	0.9613	0.9841	0.9459	1	0.9547	0.9825	0.9158	1	0.5245	0.0627	0.9373	0.3542	0.0914	0.6304	1	0.2174	0.362	0.638	0.8555	0.4475	0.7275	0.7863	0.8231	0.9583	0.6396	1	0.9184	0.7813	0.9578
TCGA-K7-A5RG	519	0	0.9193	0.8176	0.08	0.9935	0.1747	0.9491	0.9928	0.9563	0.6846	0.7913	0.9634	0.7789	1	0.7118	0.9524	1	0.3036	0.9886	0.778	0.9738	0.7612	0.7461	0.8395	0.9433	0.7697	0.9685	0.1298	0.0233	0.9767	0.5112	0.2933	0.6108	0.9143	0.3849	0.6446	0.3554	0.7104	0.2524	1	0.7401	0.459	0.7904	0.2921	0.9913	0.7343	0.5432	0.8866
TCGA-DD-A1ED	2301	0	0.9897	0.9694	0.0214	0.9703	0.9093	0.9966	0.994	0.9952	1	0.9611	1	0.8479	0.9828	0.6314	0.9785	1	0.8555	1	0.9941	0.9894	0.909	1	0.9569	0.9643	0.8638	0.9896	0.7857	0.0225	0.9775	0.5523	0.1131	0.6188	0.9935	0.3029	0	1	0.8528	0.539	1	0.958	0.8598	0.983	0.7311	1	0.9213	0.8845	0.9944
TCGA-DD-AACJ	2102	0	0.9668	0.915	0.0408	0.9308	0.355	0.9828	0.999	0.9859	0.9611	0.9042	0.9895	0.8746	1	0.2414	0.9958	1	0.4051	0.8725	0.9522	0.9788	0.801	0.9109	0.846	0.9595	0.8529	0.9824	0.1937	0.0757	0.9243	0.5177	0.0866	0.4953	0.979	0.3302	0.6535	0.3465	0.8771	0.132	0.8006	0.7936	0.5189	0.9504	0.6283	1	0.8052	0.5014	0.9696
TCGA-DD-AADV	574	0	0.9455	0.9621	0.0375	0.9655	0.70772	0.9861	0.997	0.9951	0.933	0.9613	0.9888	0.8569	0.9898	0.8225	0.9908	1	0.7921	0.9901	0.928	0.9783	0.8823	0.9105	0.8838	0.9577	0.7873	1	0.8947	0.1056	0.8944	0.4785	0.142	0.5916	0.961	0.225	0.52	0.48	0.8623	0.5717	0.7731	0.8947	0.3867	0.9434	0.5412	1	0.9163	0.6515	0.9829
TCGA-DD-AACH	195	1	0.7549	0.7624	0.0848	0.8356	0.0833	0.9559	0.9977	0.9814	0.9038	0.7212	0.9848	0.515	0.9542	0.2814	0.9773	1	0.4047	0.9794	0.7994	0.8146	0.4655	0.8876	0.8235	0.95	0.7822	0.9385	0.0423	0.2189	0.7811	0.5747	0.1295	0.8507	0.9603	0.298	0.7806	0.2194	0.7813	0.029	0.5504	0.4821	0.1251	0.7399	0.5096	0.9825	0.8443	0.3261	0.9501
TCGA-2Y-A9H4	1452	0	0.9897	0.9412	0.0584	0.9895	0.586	0.9957	0.9898	0.9694	0.8837	0.9324	0.9897	0.8318	1	0.6829	0.9912	1	0.5462	0.9574	0.8634	0.9784	0.5968	0.8837	0.9364	0.9481	0.9036	0.9742	0.347	0.062	0.938	0.7065	0.075	0.7797	1	0.374	0.1873	0.8127	0.6668	0.2263	1	0.9778	0.844	0.907	0.3852	1	0.891	0.5519	0.9678
TCGA-EP-A12J	330	0	0.9984	0.9864	0.0241	0.9497	0.9027	0.9899	1	0.9961	0.9675	0.9816	1	0.9013	1	0.8947	0.9915	1	0.8581	1	0.9588	0.9896	0.9382	1	0.9493	0.936	0.931	0.9603	0.8138	0.023	0.977	0.7301	0.0786	0.6638	0.9428	0.267	0.1956	0.8044	0.9295	0.5897	0.803	0.9921	0.9704	0.9961	0.7304	1	0.9244	0.8691	0.9886
TCGA-NI-A4U2	1791	1	0.9968	0.9805	0.0326	0.9247	0.5318	0.9929	0.998	1	0.9685	0.9758	1	0.6185	0.9949	0.6539	0.9802	1	0.5955	0.9969	0.9589	0.9944	0.8145	1	0.963	0.9827	0.8495	1	0.3562	0.0506	0.9494	0.5736	0.2293	0.5798	0.9648	0.2942	0.2346	0.7654	0.9065	0.2764	1	0.98	0.9437	0.9201	0.8112	1	0.8318	0.6945	0.9773
TCGA-BC-4072	1490	1	0.8716	0.814	0.0548	0.8634	0.3817	0.977	0.9854	0.9693	0.7761	0.7493	1	0.739	0.9575	0.5927	0.9645	1	0.5339	0.9797	0.9201	0.9373	0.4667	1	0.8497	0.8806	0.6979	0.9235	0.17	0.0718	0.9282	0.7571	0.2951	0.7466	0.9793	0.429	0.5971	0.4029	0.7253	0.1145	0.7765	0.8198	0.3353	0.9425	0.4316	0.9822	0.7954	0.2987	0.9568
TCGA-DD-AAW2	1855	0	0.9773	0.9827	0.0285	0.9679	0.8912	0.9955	0.9279	0.9877	0.9629	0.9459	0.9794	0.9598	1	0.8227	0.9878	1	0.9167	0.9907	0.9582	0.9793	0.9574	0.8836	0.9924	1	0.8783	0.971	0.7093	0.0384	0.9616	0.7221	0.1145	0.4996	0.9758	0.2427	0.3957	0.6043	1	0.3792	0.7517	0.9837	0.7852	0.9799	0.51	1	0.9245	0.9243	0.9704
TCGA-DD-AADR	2028	0	0.8901	0.892	0.0167	0.9352	0.7715	0.9822	0.9992	0.9918	0.826	0.7532	1	0.6832	1	0.7295	0.9933	1	0.7251	0.975	0.8976	0.9564	0.8238	1	0.9135	0.9462	0.7818	0.9894	0.6888	0.0168	0.9832	0.594	0.2518	0.6371	0.9691	0.2773	0.8816	0.1184	0.7502	0.3778	1	0.9568	0.404	0.9218	0.4188	1	0.7564	0.4603	0.9805
TCGA-BC-A10T	837	1	0.9821	0.9631	0.0339	0.9932	0.8326	0.9858	0.9923	0.9911	0.9759	0.9518	0.9888	0.7135	1	0.8891	0.9882	1	0.6935	0.9904	0.9685	0.9801	0.8832	0.9295	0.8977	0.96	0.9092	0.9767	0.4558	0.0465	0.9535	0.5425	0.1713	0.5956	0.9925	0.2601	0.386	0.614	0.7006	0.4292	0.7883	0.9758	0.7868	0.9317	0.5968	1	0.8825	0.7095	0.9342
TCGA-KR-A7K2	657	0	0.9917	0.9591	0.0456	0.9063	0.6796	0.9741	0.9834	0.9841	1	0.8951	0.9876	0.7814	1	0.5455	0.9927	1	0.732	0.9798	0.9549	0.9735	0.8695	0.9365	0.9656	0.9662	0.8677	0.96	0.469	0.0278	0.9722	0.2508	0.0741	0.6866	0.9698	0.0787	0.4169	0.5831	0.9045	0.4264	0.91	0.8473	0.8844	0.9225	0.3764	0.9674	0.9617	0.7418	0.8977
TCGA-MI-A75E	507	0	0.9651	0.9094	0.0707	0.9956	0.711	0.9906	0.9734	0.9871	0.8471	0.8418	0.9828	0.8302	0.99	0.6526	0.9806	1	0.6531	0.9978	0.9762	0.9652	0.9679	0.8303	0.9295	0.9576	0.6546	0.9503	0.5062	0.0531	0.9469	0.6726	0.0743	0.6959	0.9561	0.4484	0.7255	0.2745	0.6793	0.2311	0.8091	0.9207	0.7494	0.8488	0.4567	1	0.8511	0.5192	0.977
TCGA-ES-A2HT	438	1	0.9846	0.9813	0.0107	0.8893	0.6995	0.9859	0.9996	1	0.6551	0.9624	0.983	0.856	1	0.5789	0.996	1	0.6621	0.9875	0.9863	0.9904	0.826187	0	0.9267	0.9766	0.8731	1	0.3938	0.0499	0.9501	0.5613	0.1399	0.6241	0.8615	0.2146	0.2618	0.7382	0.9208	0	0.6277	0.8972	0.816	0.967	0.5323	1	0.8922	0.7156	0.9779
TCGA-DD-A73E	44	0	1	0.9904	0.038	0.9752	0.9175	0.997	0.9902	0.9957	1	0.9892	0.9947	0.8514	1	0.4697	0.9878	1	0.8593	1	0.9874	0.988	0.9533	0.9699	0.9916	0.9751	0.8833	0.9907	0.8277	0.0144	0.9856	0.4064	0.0895	0.6989	0.952	0.1232	0.0699	0.9301	0.9485	0.6788	1	0.9884	1	0.9882	0.5612	1	0.9249	0.8281	0.9907
TCGA-BC-A10Y	711	1	0.9885	0.9889	0.0471	0.8854	0.5208	0.9934	0.9969	0.9987	0.897	0.9886	0.9938	0.742	0.9896	0.7438	0.9877	1	0.68	0.9953	0.9707	0.9708	0.9646	0.9679	0.914	0.9626	0.8554	0.9735	0.2919	0.0224	0.9776	0.6093	0.3335	0.6515	0.9578	0.3114	0.6394	0.3606	0.9286	0.3565	0.9174	0.8075	0.844	0.9812	0.3542	1	0.9252	0.7739	0.9575
TCGA-DD-AAVU	2202	0	0.9432	0.9044	0.0418	0.942	0.6976	0.9794	0.9951	0.9948	1	0.8631	0.9974	0.7598	1	0.8889	0.9922	1	0.7234	0.9913	0.9347	0.9925	0.916	0.9702	0.8352	0.9757	0.8642	1	0.505	0.0192	0.9808	0.6327	0.0708	0.5024	0.9494	0.1978	0.7074	0.2926	0.85	0.0909	0.7198	0.9314	0.5269	0.963	0.3637	1	0.7312	0.5584	0.9852
TCGA-DD-A1EK	558	1	0.9378	0.9379	0.037	0.9606	0.9122	0.9645	0.9095	0.9785	0.8507	0.8918	0.9752	0.8084	1	0.6226	0.9922	1	0.8274	0.993	0.9345	0.9864	0.5092	0.5285	0.9836	0.9648	0.798	0.9583	0.7604	0.0558	0.9442	0.6784	0.2304	0.5993	0.9525	0.3272	0.3293	0.6707	0.7778	0.1408	0.6726	0.9291	0.5352	0.9527	0.7688	1	0.886	0.6417	0.9858
TCGA-DD-AAVQ	2728	0	0.888	0.9645	0.0597	0.8923	0.928	0.9833	0.9956	0.9676	0.8792	0.7863	0.9799	0.8929	0.9936	0.6667	0.9957	1	0.6583	0.9909	0.935	0.9491	0.7615	0.825	0.9734	0.9092	0.858	0.9884	0.8077	0.0297	0.9703	0.8245	0.0929	0.5806	0.9622	0.2444	0.7909	0.2091	0.8439	0.7914	0.8653	0.7709	0.2781	0.946	0.4948	0.9935	0.929	0.6744	0.9334
TCGA-DD-A39X	1694	1	0.9599	0.9114	0.0186	0.9588	0.72847	0.9747	0.9987	0.9871	0.8744	0.8368	0.9531	0.8734	0.9804	0.8154	0.9726	1	0.8075	0.9808	0.8712	0.9712	0.8695	0.4947	0.9304	0.9412	0.8935	0.9808	0.8357	0.0745	0.9255	0.6574	0.2057	0.644	0.9523	0.3151	0.8195	0.1805	0.7	0.3705	0.7094	0.8277	0.5902	0.9774	0.2802	1	0.9191	0.7525	0.9656
TCGA-DD-A4NL	1711	0	0.9914	0.9882	0.0264	0.9907	0.8679	0.998	0.9953	0.9919	0.9075	0.9831	1	0.8092	1	0.7605	0.9911	1	0.9197	1	0.9834	0.9816	0.8677	1	0.978	0.9817	0.8366	0.9602	0.6679	0.0646	0.9354	0.2544	0.0927	0.4138	0.9705	0.3091	0.0526	0.9474	0.8585	0.2364	0.8579	0.9338	0.907	0.9867	0.8323	1	0.9457	0.7279	0.9846
TCGA-CC-A7IH	365	0	0.9925	0.9944	0.0187	0.9391	0.827688	0.9991	0.9958	0.9979	1	0.9843	0.9909	0.8298	0.9747	0.7845	0.9936	1	0.9437	1	0.9974	0.9677	0.9744	0.9703	0.9576	0.975	0.9645	0.9235	0.8097	0.0202	0.9798	0.458	0.039	0.7362	0.9866	0.2192	0.4051	0.5949	0.9566	0.3474	1	0.9869	0.8855	0.9862	0.6812	1	0.9758	0.8902	0.99
TCGA-DD-AACL	107	1	0.4875	0.4656	0.1025	0.8512	0.1188	0.8394	0.6989	0.9076	0.5587	0.5732	0.9448	0.72367	0.8835	0.0909	0.9081	1	0.2865	0.9164	0.6167	0.9578	0.2803	0.502	0.723	0.9303	0.8179	0.8898	0.0255	0.028	0.972	0.7295	0.3028	0.8445	0.8727	0.2841	0.8908	0.1092	0.5568	0.0958	0.6549	0.6788	0.0826	0.8353	0.4426	0.9135	0.6537	0.3222	0.9171
TCGA-DD-AAEA	575	0	0.9641	0.7103	0.1057	0.9205	0.6392	0.9671	0.9914	0.9938	0.8674	0.6371	0.9415	0.8467	1	0.6596	0.9762	1	0.6084	0.9908	0.6556	0.9699	0.2614	0.5426	0.7865	0.9775	0.7575	1	0.3524	0	1	0.662	0.386	0.6834	1	0.4472	0.7103	0.2897	0.6797	0	1	0.9655	0.7607	0.962	0.4658	1	0.7851	0.4651	0.9822
TCGA-DD-AACC	1685	1	0.9356	0.9292	0.0854	0.8458	0.3894	0.9866	0.9694	0.9819	0.8692	0.8673	0.976	0.6799	0.9839	0.7576	0.992	1	0.5567	0.9831	0.8887	0.9613	0.8617	0.8101	0.9092	0.9445	0.7714	0.9048	0.1652	0.0333	0.9667	0.7074	0.099	0.6288	0.9657	0.274	0.7791	0.2209	0.6836	0.1251	0.7626	0.9342	0.3811	0.9478	0.8893	1	0.8896	0.6215	0.9489
TCGA-EP-A3JL	303	0	0.9038	0.8614	0.0633	0.961	0.5086	0.9743	0.9928	0.991	0.7524	0.6402	0.9928	0.6363	0.9918	0.4945	0.9805	1	0.6854	0.9728	0.8048	0.9627	1	0.9412	0.9425	0.9402	0.7144	0.9574	0.2702	0.0992	0.9008	0.7357	0.2452	0.7402	0.9468	0.4747	0.7693	0.2307	0.6166	0.2828	0.5856	0.8742	0.6103	0.9502	0.5976	1	0.8245	0.7666	0.9474
TCGA-G3-A3CK	585	0	0.9863	0.9935	0.0343	0.9588	0.7895	0.9916	0.9904	0.9935	0.9251	0.9939	0.9959	0.8282	0.9957	0.6907	0.9836	1	0.7916	0.9956	0.992	0.9854	0.9686	0.9704	0.9467	0.9801	0.8715	0.9794	0.656	0.0209	0.9791	0.5842	0.0988	0.6628	0.9871	0.2602	0.6078	0.3922	0.8207	0.2993	1	0.9606	0.8444	0.973	0.4767	1	0.8971	0.8003	0.9801
TCGA-DD-AADF	115	1	0.9086	0.8323	0.0565	0.8262	0.3097	0.9858	0.9887	0.9838	0.816778	0.832	0.9844	0.5471	1	0.4545	0.9616	1	0.5098	0.9477	0.7934	0.9927	0.3968	0.7994	0.862	0.9471	0.6556	0.9811	0.1483	0.0218	0.9782	0.5284	0.2233	0.7591	0.9614	0.3892	0.6634	0.3366	0.7251	0.1265	0.604	0.9419	0.455	0.9289	0.6752	1	0.7462	0.4546	0.9888
TCGA-RC-A7SH	468	0	0.788	0.8096	0.0325	0.9743	0.8189	0.9634	0.9827	0.9548	1	0.6063	0.9883	0.8836	0.9787	0.44545	0.9942	1	0.7926	0.9732	0.8635	0.8625	0.5718	0.9299	0.8688	0.9156	0.8501	0.9511	0.7225	0.0225	0.9776	0.8742	0.0642	0.4594	0.9468	0.4058	0.4228	0.5772	0.7125	0.28069	0.83	0.406	0.1549	0.9238	0.227	0.9598	0.9668	0.8085	0.9533
TCGA-5C-A9VH	322	0	0.9875	1	0.0337	0.9421	0.9081	0.9867	0.9946	0.9909	0.8385	1	0.9919	0.8091	0.9892	0.6331	0.9935	1	0.8079	0.989	0.9648	0.9063	0.7611	0.9561	0.9683	0.9273	0.8554	0.9891	0.837	0.0328	0.9672	0.4713	0.0642	0.4942	0.9633	0.3714	0.2985	0.7015	0.8982	0.30354	0.9353	0.8977	0.8071	0.9722	0.531	1	0.8753	0.7134	0.9856
TCGA-G3-A5SJ	698	0	0.8959	0.943	0.0823	0.9569	0.5068	0.9819	0.7603	0.9809	0.9483	0.9176	0.9943	0.6197	0.9939	0.5514	0.9788	1	0.6153	0.9916	0.9755	0.9607	0.6542	0.9703	0.8744	0.9499	0.7454	0.988	0.2891	0.1659	0.8341	0.9365	0.4314	0.7977	0.9837	0.4244	0.6512	0.3488	0.7419	0.1892	0.7905	0.6306	0.4788	0.9237	0.7337	1	0.8274	0.4419	0.964
TCGA-ED-A8O6	56	1	0.742	0.5287	0.131	0.8051	0.2537	0.9388	0.9954	0.9825	0.6202	0.5369	0.9751	0.6227	0.9805	0.4318	0.9443	1	0.4246	0.9087	0.8044	0.7267	0.8282	0.8974	0.8455	0.9145	0.5818	0.9147	0.1751	0.0591	0.9409	0.8159	0.3486	0.7447	0.972	0.4379	0.731	0.269	0.6005	0.1592	0.7867	0.5578	0.2328	0.9298	0.2114	1	0.7171	0.2445	0.9599
TCGA-DD-AAD2	658	0	0.9214	0.9646	0.0327	0.9807	0.6618	0.9826	0.9973	0.9658	0.9629	0.9384	0.9701	0.6617	0.9886	0.5634	0.989	1	0.6497	0.9915	0.9604	0.9749	0.82	0.8358	0.8981	0.9612	0.8772	0.98	0.4586	0.0962	0.9038	0.8364	0.115	0.5334	0.9393	0.38	0.5934	0.4066	0.8225	0.1936	0.5464	0.9323	0.4345	0.9602	0.5106	1	0.8839	0.7178	0.9434
TCGA-FV-A2QR	581	1	0.9878	0.9488	0.0417	0.9309	0.8293	0.9818	0.9687	0.9871	0.9591	0.9036	1	0.8791	0.996	0.5577	0.9805	1	0.8353	1	0.9776	0.9718	0.6091	1	0.9477	0.9832	0.8503	0.9364	0.6176	0.0492	0.9508	0.722	0.1934	0.6835	0.966	0.4144	0.2067	0.7933	0.825	0.3063	0.7818	0.9029	0.8564	0.9708	0.3978	1	0.893	0.6965	0.9789
TCGA-DD-AAVZ	1900	0	0.9818	0.9589	0.0241	0.9291	0.8968	0.9708	0.9997	0.9927	0.8524	0.86	0.996	0.8141	1	0.822	0.9855	1	0.7906	0.9807	0.9555	0.9124	0.9683	0.9676	0.946	0.9435	0.8781	0.9523	0.7512	0.0179	0.9821	0.5603	0.139	0.6002	0.9723	0.3117	0.5643	0.4357	0.7381	0.095	0.7772	0.8405	0.7772	0.962	0.6514	1	0.8741	0.5077	0.9724
TCGA-2Y-A9H0	3675	0	0.8599	0.9205	0.0404	0.9048	0.843	0.9615	0.9939	0.9805	0.6474	0.9077	0.9496	0.8519	1	0.6627	0.9714	1	0.742	0.9726	0.9144	0.9023	0.234	0.6794	0.8675	0.9518	0.8462	0.9578	0.6932	0.0152	0.9848	0.4247	0.218	0.7693	0.9386	0.3505	0.7099	0.2901	0.6298	0.3817	0.7573	0.8739	0.4244	0.9518	0.4066	0.977	0.918	0.5326	0.949
TCGA-ZP-A9CY	782	0	0.996	1	0.0321	0.9933	0.8975	0.9974	0.9901	1	1	1	1	0.8092	0.9903	0.7563	0.9907	1	0.8852	1	0.9852	0.9764	0.8767	1	0.9724	0.9742	0.9185	0.9555	0.7458	0.0303	0.9697	0.43	0	0.655	0.984	0.2965	0.1825	0.8175	0.8929	0.2062	0.8097	0.9599	0.9322	0.961	0.7619	1	0.926	0.8414	0.9796
TCGA-DD-AAEG	719	0	0.9668	0.9441	0.0283	0.9504	0.9032	0.9803	0.9859	0.9919	0.9101	0.8803	0.9733	0.7753	0.9943	0.5279	0.99	1	0.7105	0.9911	0.9405	0.9909	0.9656	0.7372	0.9369	0.9668	0.8738	0.9695	0.8049	0.0614	0.9386	0.3438	0.0939	0.8466	0.9695	0.2597	0.541	0.459	0.8165	0.5603	0.8217	0.9774	0.6414	0.9585	0.4107	0.9898	0.9356	0.6245	0.9718
TCGA-DD-A11C	662	0	0.9838	0.6407	0.0674	0.9804	0.4822	0.978	0.9923	0.972	0.7629	0.5463	0.9824	0.7455	0.9935	0.6834	0.9853	1	0.5653	0.9343	0.8152	0.9592	0.9427	0.882	0.8472	0.9491	0.7355	1	0.3172	0.033	0.967	0.6326	0.2486	0.6181	0.9726	0.4174	0.4856	0.5144	0.4643	0.1549	0.7202	0.9369	0.8041	0.9425	0.5389	0.9864	0.8347	0.3662	0.9915
TCGA-2Y-A9GU	1939	0	0.9954	1	0.0326	0.9353	0.8968	0.9887	1	0.9962	0.9705	1	0.9905	0.7987	0.9916	0.8102	0.992	1	0.84	1	1	0.9739	0.7921	0.9802	0.9935	0.9795	0.8807	0.8692	0.6352	0.0833	0.9167	0.5113	0.0694	0.6188	0.9739	0.2834	0.201	0.799	0.8996	0.3454	0.9138	0.9559	0.928	0.9669	0.6174	1	0.9632	0.7728	0.9856
TCGA-CC-A5UE	272	1	0.8656	0.6556	0.1152	0.8155	0.1752	0.9251	0.9782	0.9781	0.8669	0.7462	0.9513	0.7296	0.9525	0.4969	0.9564	1	0.3689	0.9687	0.6751	0.9783	0.8681	0.7588	0.7283	0.9124	0.8055	0.9138	0.0943	0.0595	0.9405	0.6717	0.1324	0.7584	0.9149	0.4758	0.8612	0.1388	0.784	0.1066	0.933	0.587	0.3218	0.8469	0.1574	1	0.8685	0.3072	0.9195
TCGA-ED-A7XP	400	0	0.8196	0.9115	0.0528	0.927	0.5346	0.9475	0.9921	0.9761	0.8385	0.8487	0.9899	0.6137	0.9509	0.5139	0.9561	1	0.5226	0.9787	0.8919	0.9734	0.8117	0.88024	0.8792	0.9339	0.8077	0.9562	0.2106	0.1378	0.8622	0.5312	0.3096	0.6579	0.8906	0.4044	0.7069	0.2931	0.641	0.124	0.665	0.8946	0.3291	0.8418	0.4999	0.9894	0.9393	0.51	0.9321
TCGA-DD-AAVW	2317	0	0.982	0.9613	0.0244	0.9454	0.9035	0.9525	0.9996	1	0.9179	0.8872	0.9791	0.9288	0.9873	0.7597	0.997	0.99925	0.8311	0.9939	0.8348	0.9469	0.8333	0.9149	0.9879	0.9193	0.7777	0.9884	0.6538	0.038	0.962	0.5513	0.1827	0.4919	0.9862	0.2797	0.4198	0.5802	0.9461	0.1375	0.7977	0.7398	0.767	0.9738	0.6903	0.9933	0.918	0.7296	0.9762
TCGA-DD-A73D	693	0	0.9882	0.9684	0.0336	0.9726	0.839	0.9893	0.9966	0.9918	0.9763	0.9398	0.9839	0.7661	1	0.6987	0.9886	1	0.7672	0.9844	0.9194	0.9772	0.9748	0.8999	0.9112	0.9427	0.8569	0.9401	0.6736	0.0101	0.9899	0.276	0.161	0.6346	1	0.2656	0.1629	0.8371	0.9261	0.3604	0.758	0.953	0.8796	0.9045	0.4474	1	0.8865	0.6959	0.9368
TCGA-RC-A7SB	588	0	0.951	0.8825	0.0615	0.993	0.9204	0.9933	0.8771	1	0.9383	0.9282	0.9852	0.856	0.9947	0.6437	0.9948	1	0.6505	0.9987	0.9244	0.9906	0.7597	0.8502	0.9141	0.9924	0.801	0.9714	0.7406	0.0489	0.9511	0.6386	0.0805	0.6566	0.9628	0.23	0.4074	0.5926	0.8887	0.76	0.8603	0.9059	0.5847	0.9387	0.7419	1	0.7994	0.455	0.9885
TCGA-2Y-A9GW	1271	1	0.9641	0.976	0.0509	0.9758	0.7312	0.9887	0.9818	0.9877	0.8898	0.9181	1	0.7827	0.9791	0.7252	0.9904	1	0.6077	0.9895	0.9584	0.9788	0.9397	1	0.9859	0.9641	0.7671	1	0.6068	0.0552	0.9448	0.4908	0.0715	0.5409	0.9925	0.3704	0.5913	0.4087	0.7527	0.2808	0.9421	0.9361	0.6889	0.9578	0.6128	1	0.9017	0.5395	0.9758
TCGA-DD-A4NB	391	0	0.9612	0.9947	0.0238	0.9647	0.4591	1	0.9988	1	0.8837	0.9732	1	0.6456	1	0.6916	0.9835	1	0.6552	0.9901	0.978	0.9781	0.8156	1	0.965	0.9648	0.8681	0.9563	0.1893	0.0554	0.9446	0.5131	0.1527	0.634	0.96	0.6093	0.5231	0.4769	1	0.1573	1	0.7574	0.5847	0.9785	0.5484	1	0.9109	0.6972	0.9697
TCGA-DD-A113	2425	0	0.9656	0.952	0.0243	0.8918	0.8445	0.9817	0.9982	0.9942	0.9032	0.8574	0.9953	0.6893	0.9914	0.793	1	1	0.6595	0.9943	0.8406	0.9896	0.8422	0.9722	0.9716	0.9768	0.9614	0.977	0.7827	0.1042	0.8958	0.347	0.1281	0.7574	0.9674	0.3703	0.5679	0.4321	0.7754	0.2855	0.7457	0.6459	0.7192	0.9834	0.376	1	0.8976	0.619	0.9886
TCGA-DD-A119	223	1	0.9423	0.9271	0.0407	0.9325	0.8151	0.9789	0.9976	0.9923	0.853071	0.9111	0.9458	0.5063	1	0.49588	0.9926	1	0.5005	0.9941	0.9154	0.9694	0.80155	0.4645	0.8519	0.9493	0.7953	0.971	0.4743	0.0322	0.9678	0.6134	0.2246	0.5514	1	0.3325	0.7187	0.2813	0.4903	0.142	0.80868	0.965	0.3589	0.9608	0.5269	0.9663	0.8514	0.5957	0.9595
TCGA-G3-AAV5	354	0	0.9908	0.9776	0.0455	0.9906	0.5647	0.991	0.9971	0.9905	0.9664	0.9568	1	0.7341	1	0.6395	0.9863	1	0.5831	0.9974	0.9705	0.9766	0.6888	1	0.9397	0.9644	0.8921	1	0.2708	0.1209	0.8791	0.5266	0.1679	0.671	0.9658	0.228	0.7963	0.2037	0.7072	0.149	0.7971	0.9652	0.88	0.9599	0.3747	0.9868	0.8768	0.6283	0.982
TCGA-DD-AADC	425	1	0.7985	0.8454	0.1153	0.9401	0.0348	0.8717	0.9713	0.9565	0.6263	0.7954	0.9914	0.7257	0.9774	0.5909	0.983	1	0.2833	0.9798	0.8934	0.9424	0.7742	0.9389	0.8638	0.9486	0.7702	0.9295	0.0186	0.0101	0.9899	0.8753	0.3529	0.7037	0.9528	0.4576	0.8421	0.1579	0.5649	0.0649	0.6209	0.6326	0.2839	0.9148	0.4788	1	0.739	0.4354	0.8011
TCGA-2Y-A9HA	36	1	0.8295	0.9181	0.0673	0.2756	0.7403	0.9783	0.9947	0.984	0.8069	0.9035	0.9572	0.8744	0.9722	0.5466	0.9732	1	0.6991	0.9767	0.8949	0.9734	0.8353	0.7581	0.9303	0.9553	0.8801	0.9555	0.48	0.0422	0.9578	0.5528	0.1569	0.6317	0.9496	0.2655	0.6994	0.3006	0.8438	0.0665	0.8931	0.9041	0.268	0.9777	0.6078	0.9895	0.8678	0.5867	0.9717
TCGA-MI-A75H	747	0	0.9983	0.9972	0.0082	0.9084	0.9043	0.9975	0.9861	0.9947	1	0.9941	0.9947	0.9209	1	0.6	0.9963	1	0.9126	0.9954	0.9952	0.9899	0.9547	0.963	0.9673	0.975	0.8848	0.959	0.812	0.0125	0.9875	0.3204	0.0676	0.6113	0.9611	0.3645	0.65	0.35	0.9433	0.5227	0.8892	0.9617	0.9549	0.9874	0.727	0.9684	0.899	0.8801	0.9795
TCGA-G3-A3CJ	594	0	0.9957	0.9787	0.0174	0.986	0.8725	0.9943	0.9985	0.9947	1	0.9567	0.9964	0.9485	1	0.495543	0.9861	1	0.7921	0.9924	0.9722	0.9979	0.84455	0.9486	0.9633	0.9793	0.8725	0.9912	0.6598	0.0293	0.9707	0.3758	0.0838	0.5418	1	0.1484	0.2387	0.7613	0.7183	0.2195	0.82552	0.9545	0.9388	0.98	0.7605	1	0.8626	0.7875	0.9861
TCGA-BC-A69I	387	0	0.988	0.9853	0.0354	0.9697	0.9119	0.9968	0.9939	1	0.915	0.9789	0.9979	0.8626	1	0.7816	0.996	1	0.8932	0.9947	0.9701	0.9858	0.833	0.974	0.9405	0.9822	0.8416	0.9869	0.7602	0.0108	0.9892	0.5474	0.151	0.7019	0.9869	0.288	0.1306	0.8694	0.8653	0.4802	1	0.9687	0.853	0.982	0.7142	1	0.8968	0.8624	0.9896
TCGA-EP-A2KA	357	0	0.9718	0.9124	0.0548	0.9342	0.8878	0.986	0.9905	0.9785	0.9007	0.8383	0.9859	0.6243	1	0.6718	0.9972	1	0.8246	0.9858	0.8859	0.96	0.739	0.9102	0.9055	0.9557	0.8392	0.9577	0.596	0.0463	0.9537	0.5911	0.1174	0.7192	0.9578	0.575	0.3761	0.6239	0.8828	0.3798	0.7498	0.9618	0.7	0.9794	0.4865	1	0.8161	0.7279	0.9696
TCGA-UB-A7MD	52	1	0.8457	0.7166	0.0342	0.8692	0.6382	0.974	0.989	0.9905	0.9061	0.8218	0.9915	0.7711	1	0.6866	0.9871	1	0.6006	0.9925	0.8549	0.9729	0.9316	0.914	0.8031	0.9439	0.8832	0.9855	0.3915	0.0796	0.9204	0.3579	0.3189	0.7196	0.9314	0.2458	0.4971	0.5029	0.8424	0.3479	0.7917	0.8136	0.3235	0.9414	0.6718	0.9867	0.9118	0.5811	0.9489
TCGA-DD-AAEI	1531	0	0.9572	0.9463	0.0268	0.9882	0.7091	0.9716	0.9902	0.9939	0.8329	0.9013	0.9909	0.8703	1	0.8246	0.9844	1	0.6867	0.9905	0.9415	0.9807	0.9543	0.8781	0.9217	0.9569	0.7019	0.9669	0.4673	0.0099	0.9901	0.578	0.1352	0.5801	1	0.2406	0.7909	0.2091	0.7798	0.3758	0.8836	0.962	0.5628	0.9837	0.6342	1	0.78	0.4623	0.9668
TCGA-DD-AAE9	722	0	0.9133	0.9944	0.0262	0.9932	0.763	0.9828	0.9979	0.9863	0.9383	0.9805	1	0.7711	1	0.6271	0.9908	1	0.8297	0.9968	0.9716	0.961	0.9236	1	0.9584	0.971	0.9062	0.9595	0.5733	0.0656	0.9344	0.2503	0.0589	0.7417	1	0.3348	0.8937	0.1063	0.8147	0.3142	0.8653	0.9411	0.4562	0.9902	0.5393	0.9749	0.894	0.7352	0.9877
TCGA-ED-A5KG	482	0	0.9415	0.9787	0.0733	0.8422	0.7515	0.9674	0.9959	0.9949	0.9101	0.9375	0.9947	0.6112	0.9795	0.5336	0.9832	0.918	0.7675	0.9728	0.9397	0.9478	0.6908	0.9683	0.9868	0.9334	0.8523	0.9273	0.6943	0.0377	0.9623	0.8257	0.1184	0.6386	0.9846	0.4918	0.7225	0.2775	0.8076	0	0.8373	0.5473	0.3747	0.9489	0.5991	1	0.9318	0.52	0.9527
TCGA-GJ-A9DB	67	1	0.9953	0.9875	0.05	0.9743	0.9089	0.9942	0.7614	0.9958	0.8703	0.9781	0.9964	0.8734	1	0.5779	0.984	1	0.868	0.9931	0.9503	0.9772	0.6743	0.9868	0.9536	0.9753	0.8787	0.9384	0.8274	0.0573	0.9427	0.4812	0.1263	0.6723	0.968	0.2717	0.2482	0.7518	0.9754	0.4307	0.9149	0.8832	0.9325	0.9779	0.5522	1	0.9064	0.819	0.9838
TCGA-DD-AAD6	672	0	0.8553	0.769	0.1534	0.9187	0.1891	0.973	0.9967	0.9843	0.827025	0.4356	0.9873	0.4302	0.977	0.4958	0.9759	1	0.4102	0.8912	0.803	0.8791	0.71645	0.932	0.8452	0.9212	0.6249	1	0.0535	0.0477	0.9523	1	0.1631	0.8379	0.7163	0.4121	0.7812	0.2188	0.5431	0	1	0.8865	0.4878	0.8723	0.483	0.9493	0.7252	0.3955	0.9264
TCGA-CC-A7IL	278	1	0.9973	0.9903	0.0266	0.905	0.84011	0.9926	0.9985	0.9957	0.9101	0.9887	0.9903	0.8334	0.9978	0.5725	0.9919	1	0.8601	1	0.9891	0.8881	0.9929	0.9407	0.9564	0.9839	0.9363	1	0.878	0.113	0.887	0.6013	0.1591	0.732	1	0.2571	0.4598	0.5402	0.9797	0.4879	0.8872	0.878	0.9552	0.9834	0.41	1	0.8717	0.8207	0.9911
TCGA-CC-A8HV	279	1	0.6155	0.6604	0.1028	0.7191	0.6334	0.9456	0.9944	0.9636	0.8986	0.4936	0.9789	0.4984	0.815	0.6667	0.9593	1	0.5422	0.9023	0.7385	0.9053	0.514	0.9227	0.8601	0.8648	0.8663	0.8214	0.4414	0.0228	0.9772	0.5634	0.1978	0.6475	0.9217	0.5119	0.5736	0.4264	0.7904	0.0963	0.6981	0.1704	0.0896	0.9158	0.2859	0.9345	0.9267	0.2827	0.9021
TCGA-FV-A3R3	366	1	0.9926	0.9932	0.0213	0.9965	0.811	0.9943	0.9994	0.9923	0.873	0.9817	0.9917	1	1	0.7636	0.9969	1	0.7645	0.9905	0.9595	0.988	0.9066	0.9256	1	0.9461	0.9442	0.9378	0.7164	0.1022	0.8978	0.6153	0.0732	0.6294	0.9693	0.3691	0.0131	0.9869	0.9702	0.3343	1	0.8039	0.8824	0.9693	0.5416	1	0.8937	0.7163	0.984
TCGA-RC-A7S9	640	0	0.909	0.8981	0.0505	0.9119	0.3693	0.9746	0.9908	0.9842	0.8898	0.7925	0.9977	0.612	0.9788	0.4839	0.9944	1	0.521	0.9748	0.9389	0.966	0.6302	0.9799	0.9493	0.9595	0.6727	1	0.1636	0.0377	0.9623	0.6821	0.3284	0.8187	0.9122	0.2195	0.7073	0.2927	0.6384	0.0453	0.7248	0.627	0.4128	0.8956	0.349	1	0.8381	0.3273	0.9704
TCGA-DD-AAD3	1295	0	0.983	0.9855	0.0502	0.9619	0.8926	0.9749	0.9988	0.9914	0.9661	0.9669	0.9813	0.9251	1	0.7621	0.9953	1	0.8291	1	0.9873	0.9929	0.8896	0.8544	0.9805	0.9809	0.8317	1	0.7448	0.0616	0.9384	0.6855	0.1623	0.4799	0.9842	0.3502	0.4008	0.5992	0.8213	0.3714	0.8371	0.9154	0.7897	0.956	0.6079	1	0.8696	0.8436	0.9788
TCGA-ZS-A9CG	341	0	0.9965	0.9796	0.0343	0.9883	0.9032	0.9984	0.9984	0.9873	0.9101	0.9549	1	0.8568	1	0.4666	1	1	0.8233	0.9894	0.9781	0.9778	0.8655	1	0.9763	0.9649	0.9277	1	0.7221	0.0402	0.9598	0.4128	0.1791	0.6651	0.9454	0.2454	0.0554	0.9446	0.8762	0.384	0.9335	0.9045	0.911	0.9942	0.6159	1	0.9015	0.7879	0.9897
TCGA-DD-AAC9	347	0	0.983	0.9858	0.0376	0.8609	0.6307	0.9895	0.9886	0.9869	0.8433	0.9587	1	0.8143	0.9859	0.8214	0.9765	1	0.6247	1	0.9771	0.9886	0.7532	1	0.9561	0.9872	0.7927	0.982	0.2851	0.0548	0.9452	0.5325	0.2623	0.6401	0.9697	0.2546	0.5437	0.4563	0.6511	0.2522	0.8999	0.9224	0.8382	0.941	0.6481	1	0.898	0.6492	0.9639
TCGA-ZP-A9CV	1088	1	1	0.9853	0.0459	1	0.84334	0.9866	0.9443	0.9874	0.9193	0.9636	0.9741	0.8035	1	0.9136	0.9719	1	0.8803	1	0.9719	0.9796	0.8776	0.8345	0.9682	0.9339	0.9355	0.9877	0.8724	0.0732	0.9268	0.8305	0.0169	0.6984	0.9737	0.1785	0.2917	0.7083	0.911	0.6279	0.8758	0.9668	1	0.9828	0.5396	1	0.95	0.8354	0.9715
TCGA-DD-A4NK	1210	1	0.9895	1	0.0274	0.9344	0.82952	0.9533	0.9032	1	1	1	0.9812	0.894	1	0.7001	0.9239	1	0.6828	1	0.986	0.9573	0.9056	0.9309	0.9891	0.9819	0.7959	1	0.693767	0.0713	0.9287	0.7746	0.0826	0.6982	0.9654	0.3334	0.0336	0.9664	0.984	0.6975	0.896	0.9668	0.8919	0.9634	0.582	0.994	0.9556	0.7499	0.9923
TCGA-G3-A3CI	180	0	0.9896	0.985	0.0383	0.9766	0.9218	1	0.9895	1	0.9084	0.9721	1	0.882	1	0.6578	0.9903	1	0.9233	0.9935	0.9876	0.9861	0.9712	1	0.9543	0.9807	0.8936	0.9637	0.7249	0.0661	0.9339	0.7891	0.1018	0.6765	0.9684	0.5335	0.254	0.746	0.8427	0.1468	0.6487	0.8846	0.887	0.9723	0.6319	1	0.9251	0.7567	0.9916
TCGA-ED-A66Y	296	1	0.8871	0.8812	0.0906	0.9277	0.1503	0.9744	0.9648	0.9341	0.8994	0.6533	0.9891	0.4976	0.9644	0.6385	0.9741	1	0.3463	0.9607	0.8708	0.9055	0.6626	0.9359	0.8792	0.9324	0.556	0.8825	0.0739	0.0435	0.9565	0.7337	0.2243	0.6176	0.9228	0.6009	0.679	0.321	0.7779	0.0685	0.574	0.1229	0.491	0.8444	0.2301	0.983	0.8536	0.4459	0.8658
TCGA-DD-AACX	170	0	0.953	0.9086	0.0834	0.9616	0.6698	0.9882	0.9984	0.9826	0.9179	0.8686	0.9911	0.8368	1	0.602	0.9847	1	0.6049	0.9903	0.9163	0.9866	0.7229	0.9351	0.9183	0.9429	0.8618	1	0.4563	0.0697	0.9303	0.5855	0.131	0.646	0.9165	0.23	0.7807	0.2193	0.8546	0.2515	0.924	0.8809	0.5582	0.9617	0.6011	0.9708	0.8636	0.6523	0.9618
TCGA-HP-A5MZ	91	1	0.9645	0.9715	0.0464	0.9709	0.6345	0.9829	0.9983	0.9951	0.7599	0.9118	0.9796	0.7102	0.9875	0.5675	0.9751	0.9203	0.6051	0.985	0.9518	0.9599	0.7557	0.9131	0.9467	0.9712	0.8552	0.9746	0.3926	0.0459	0.9541	0.9024	0.1181	0.6	0.954	0.2329	0.5248	0.4752	0.862	0.1643	0.657	0.8792	0.7017	0.9707	0.6006	1	0.9142	0.6487	0.9793
TCGA-BC-A10W	91	1	0.8733	0.9507	0.042	0.9819	0.7647	0.9766	0.9901	0.9884	0.8762	0.8672	0.9879	0.8913	0.9875	0.577	0.9833	1	0.846	1	0.9759	0.9126	0.6014	0.9078	0.9591	0.9907	0.9076	0.7607	0.6211	0.0262	0.9738	0.7772	0.4822	0.6337	0.9803	0.4264	0.8388	0.1612	0.693	0.3176	0.7991	0.4614	0.3572	0.9796	0.7655	1	0.8488	0.6592	0.9437
TCGA-DD-AACF	365	1	0.9768	0.9782	0.0255	0.8831	0.8927	0.9858	0.9951	0.9969	0.9172	0.9721	0.9923	0.9268	1	0.6695	1	1	0.5457	0.9812	0.9067	0.9269	0.9696	0.9261	0.9534	0.9594	0.7747	0.9384	0.7362	0.0281	0.9719	0.7679	0.1897	0.7536	0.9118	0.2261	0.4861	0.5139	0.7996	0.4643	0.7488	0.8637	0.7937	0.9445	0.3365	1	0.7988	0.7552	0.9676
TCGA-KR-A7K7	407	0	0.6969	0.6673	0.0858	0.8498	0.0114	0.9495	0.9942	0.9424	0.7169	0.5999	0.9796	0.4695	0.9807	0.382944	0.9819	1	0.3078	0.9337	0.7411	0.9653	0.78205	0.6987	0.8396	0.9537	0.7505	0.9556	0.0111	0.0212	0.9788	0.3889	0.2798	0.5915	0.8881	0.3117	0.8384	0.1616	0.6047	0.0106	1	0.7439	0.1161	0.9085	0.8543	0.8966	0.7395	0.2057	0.9068
TCGA-MI-A75C	291	0	0.9268	0.822	0.0662	1	0.4236	0.9716	0.9895	0.9673	0.7916	0.65	0.9561	0.7699	1	0.5833	0.9843	1	0.3888	0.982	0.9006	0.9332	0.6267	0.7293	0.8528	0.9817	0.7233	0.9927	0.2783	0.1133	0.8867	0.6668	0.1091	0.6797	0.9269	0.205	0.7418	0.2582	0.7303	0.1707	0.7564	0.9644	0.5122	0.9296	0.5129	0.9831	0.851	0.5707	0.9542
TCGA-DD-A4NQ	373	1	0.6096	0.795	0.1143	1	0.0857	0.9263	0.6316	0.9556	0.5757	0.5956	0.9474	0.697	0.97	0.5563	0.9545	1	0.397	1	0.786	0.9446	0.3263	0.6691	0.883	0.9776	0.7412	0.9565	0.0572	0.0493	0.9507	0.8329	0.1736	0.785	0.9629	0.66	0.9028	0.0972	0.4283	0.017	0.6162	0.7238	0.1016	0.8738	0.2055	0.8482	0.5232	0.4229	0.8609
TCGA-DD-AACU	1567	0	0.9964	1	0.072	0.8362	0.9241	0.9959	0.9984	0.99	0.9159	1	0.9885	0.7814	0.9917	0.8447	0.9854	1	0.8782	0.9923	0.9258	0.9439	0.9291	0.8838	0.9369	0.9777	0.861	1	0.7653	0.0404	0.9596	0.7034	0.1172	0.6273	0.9873	0.2064	0.3122	0.6878	0.7477	0.5576	0.7887	0.949	0.9597	0.9522	0.6047	0.989	0.8874	0.6648	0.986
TCGA-GJ-A6C0	31	1	0.8057	0.7821	0.094	0.8263	0.0984	0.937	0.9006	0.9339	0.8764	0.7443	0.9726	0.64	0.9726	0.4485	0.9694	1	0.3753	0.9759	0.7788	0.9876	0.1376	0.8256	0.8755	0.9336	0.6845	0.9645	0.077	0.1608	0.8392	0.6511	0.2473	0.4381	0.9371	0.456	0.8134	0.1866	0.6353	0.0852	0.7956	0.8604	0.2019	0.8364	0.6376	0.9704	0.825	0.4103	0.9137
TCGA-5R-AA1C	364	0	0.9175	0.9824	0.0515	0.9827	0.4964	0.9929	1	0.9852	0.9126	0.9544	1	0.7753	0.9832	0.5851	0.9931	1	0.7104	1	0.9685	0.998	0.882	1	0.9538	0.9411	0.5944	1	0.306	0.0406	0.9594	0.5528	0.1087	0.6926	0.9603	0.1616	0.5225	0.4775	0.8538	0.2674	0.6737	0.9584	0.3756	0.9319	0.5124	1	0.7551	0.6745	0.9613
TCGA-DD-A1EF	394	1	0.899	0.7063	0.1591	0.8907	0.3614	0.903	0.9969	0.92	0.8175	0.5108	0.9736	0.4706	0.9477	0.7335	0.9704	1	0.5229	0.9715	0.8348	0.9661	0.874	0.8079	0.9216	0.8965	0.713	0.9252	0.0703	0.0727	0.9273	0.5209	0.2292	0.4619	0.9845	0.5484	0.7487	0.2513	0.632	0.0848	0.728	0.9315	0.4009	0.8811	0.5245	0.9836	0.7859	0.3693	0.9053
TCGA-5R-AAAM	46	1	0.9904	1	0.0232	0.9528	0.8553	0.9962	0.9983	0.9923	0.8777	1	0.985	0.7998	1	0.7968	0.9872	1	0.9149	0.9973	0.967	0.9683	0.9396	0.9264	0.9711	0.9534	0.8025	0.9728	0.6861	0.0398	0.9602	0.514	0.1127	0.5877	0.9677	0.2234	0.183	0.817	0.8886	0.2345	0.8006	0.9386	0.8734	0.9747	0.6083	1	0.8929	0.7471	0.9872
TCGA-ZP-A9D0	717	0	0.9988	0.9785	0.0237	0.9802	0.882175	0.9931	0.999	0.9939	0.9668	0.9554	0.9894	0.8911	0.9875	0.7787	1	1	0.8529	1	0.9661	0.9723	0.9631	0.9639	0.9928	0.9582	0.9399	0.9567	0.8486	0.0335	0.9665	0.4132	0.0441	0.7313	1	0.2355	0.0727	0.9273	0.8972	0.3768	1	0.9877	0.9816	0.9883	0.5068	1	0.9818	0.7598	0.989
TCGA-DD-AAE6	141	0	0.7954	0.5153	0.0848	0.9705	0.5271	0.9586	0.9986	0.9721	0.93	0.6926	0.9352	0.742	1	0.3496	0.9764	1	0.6181	0.9558	0.6784	0.9014	0.6957	0.6691	0.6842	0.9134	0.7983	0.8626	0.3009	0.034	0.966	0.8817	0.2424	0.8356	1	0.2616	0.815	0.185	0.5209	0.2618	0.5811	0.985	0.205	0.9359	0.4864	0.9837	0.7896	0.3949	0.9632
TCGA-DD-AAW0	2015	0	0.9602	0.9793	0.0493	0.9732	0.8605	0.987	0.9897	1	0.9475	0.9391	0.9781	0.7801	1	0.6499	0.9831	1	0.6678	0.9962	0.9716	0.9699	0.884	0.8621	0.9553	0.9436	0.8764	0.9838	0.7224	0.0641	0.9359	0.5611	0.1149	0.5539	0.947	0.2773	0.4051	0.5949	0.9079	0.25	0.7734	0.942	0.5783	0.9772	0.6727	1	0.8743	0.5864	0.9765
TCGA-CC-A3MA	303	1	0.8807	0.9842	0.0427	0.9265	0.7328	0.9791	0.7514	0.9973	0.9721	0.9395	1	0.7559	0.9745	0.1309	0.9944	1	0.636	1	0.9385	0.9703	0.8681	1	0.9755	0.9706	0.8611	0.8516	0.4574	0.075	0.925	0.7237	0.1078	0.689	0.9779	0.4502	0.7451	0.2549	0.7748	0.3305	0.794	0.1417	0.3149	0.9624	0.5269	1	0.8988	0.5652	0.9648
TCGA-BD-A3ER	1115	0	0.9534	0.9587	0.025	0.9742	0.6891	0.9791	0.9619	0.9848	0.9668	0.9009	0.9952	0.8764	0.9895	0.7205	0.9747	1	0.7243	0.9875	0.9844	0.9702	0.8873	0.9702	0.9424	0.9757	0.8546	0.9513	0.534	0.0857	0.9143	0.5062	0.1414	0.5914	0.9912	0.2355	0.3122	0.6878	0.9523	0.2127	0.82	0.9227	0.6321	0.9778	0.6101	1	0.896	0.6795	0.9672
TCGA-CC-A3MB	315	1	0.8708	0.9122	0.1091	0.9721	0.7894	0.9572	0.9918	0.9804	0.7973	0.689	0.979	0.6753	0.9699	0.5676	0.9887	1	0.759	0.9426	0.8469	0.9666	0.8441	0.8771	0.9446	0.9499	0.7839	0.9503	0.4335	0.1011	0.8989	0.6183	0.1376	0.6266	1	0.5634	0.7772	0.2228	0.7071	0.0689	0.8084	0.6739	0.3837	0.928	0.3128	0.9865	0.8598	0.5625	0.9774
TCGA-G3-AAV1	359	1	0.9135	0.9423	0.0797	0.99	0.7545	0.967	0.9837	0.9705	0.8692	0.878	0.9833	0.7188	0.9896	0.453	0.9868	1	0.6415	0.991	0.9439	0.9562	0.8772	0.9299	0.8848	0.9156	0.7976	0.9295	0.4191	0.1145	0.8855	0.5673	0.1721	0.7251	1	0.3714	0.7978	0.2022	0.8177	0.2502	0.652	0.8677	0.5023	0.9181	0.5076	0.974	0.7983	0.6963	0.9716
TCGA-G3-A25X	1779	0	0.9208	0.9354	0.0357	0.8991	0.3443	0.936	0.959	0.9848	0.8045	0.822	0.9918	0.74769	1	0.440844	0.9917	1	0.6963	0.9839	0.8758	0.9821	0.8282	0.877	0.9463	0.9557	0.7872	0.9445	0.3424	0.0332	0.9668	0.6324	0.0847	0.8417	0.9299	0.3302	0.7827	0.2173	0.8382	0.0539	0.8452	0.3745	0.469	0.9411	0.3794	1	0.8391	0.6028	0.9422
TCGA-CC-A9FW	248	0	0.7756	0.7925	0.1199	0.5219	0.4574	0.9678	0.9978	0.9596	0.7313	0.4933	0.9914	0.7924	0.9968	0.2653	0.9649	1	0.5017	0.9659	0.7823	0.9304	0.5397	0.8973	0.9106	0.9415	0.6636	0.9713	0.2031	0.0581	0.9419	0.7441	0.1408	0.7807	0.9879	0.4101	0.4749	0.5251	0.6654	0.0949	0.733	0.3308	0.3617	0.8956	0.8318	0.9946	0.7495	0.3875	0.987
TCGA-DD-AA3A	410	1	0.8447	0.94	0.0871	0.8388	0.3268	0.9519	0.8367	0.9652	0.7659	0.8301	0.9485	0.4838	0.9648	0.2162	0.95	1	0.369	0.9419	0.9205	0.9483	0.6963	0.742	0.9646	0.8966	0.8498	0.8212	0.1162	0.1264	0.8736	0.8208	0.1118	0.8007	0.8293	0.58	0.6148	0.3852	0.7823	0.0736	0.6437	0.2204	0.3528	0.8566	0.7997	1	0.8713	0.3831	0.9035
TCGA-CC-A5UC	347	1	0.7512	0.9246	0.0636	0.8921	0.8079	0.9739	0.9271	0.9708	0.5994	0.7445	0.9904	0.4766	0.9687	0.4516	0.9861	1	0.6584	0.931	0.7968	0.9544	0.8752	0.95	0.9396	0.9341	0.739	0.9575	0.4639	0.0474	0.9526	0.7171	0.1397	0.7963	0.9704	0.5183	0.7644	0.2356	0.6914	0.0921	0.7893	0.5761	0.1519	0.8706	0.3668	1	0.7585	0.5747	0.9567
TCGA-DD-A4NI	561	0	1	0.9931	0.026	0.9826	0.85219	0.9986	0.9976	0.9893	0.9203	0.9879	0.9892	0.8625	1	0.7751	0.9883	1	0.8733	0.9974	0.9443	0.978	0.8939	0.9539	0.9548	0.9651	0.8917	0.9889	0.7585	0.0421	0.9579	0.6585	0.0945	0.5367	0.9799	0.261	0.0676	0.9324	0.86	0.5347	0.827	0.9784	1	0.979	0.6834	0.9922	0.9032	0.8626	0.9767
TCGA-XR-A8TF	693	1	0.9095	0.8658	0.088	0.9608	0.5861	0.9661	0.9991	0.9886	0.7715	0.6242	0.9492	0.5946	0.9575	0.6876	0.9801	1	0.6263	0.9586	0.7715	0.9441	0.9687	0.7816	0.9156	0.8981	0.8091	0.9783	0.4823	0.0224	0.9776	0.6641	0.1523	0.7346	0.9225	0.2706	0.2276	0.7724	0.7033	0.4296	0.7626	0.9518	0.4	0.9148	0.4007	1	0.8689	0.6759	0.9567
TCGA-CC-5261	97	1	0.8959	0.9285	0.0528	0.9588	0.6513	0.9924	0.9542	1	1	0.8621	0.989	0.6467	1	0.467	0.9957	1	0.7692	0.9866	0.9248	0.8657	0.7708	0.9392	0.855	0.8777	0.8157	0.9704	0.5498	0.0978	0.9022	0.686	0.1804	0.8242	0.962	0.3606	0.7028	0.2972	0.8704	0.1741	0.8228	0.4064	0.4174	0.9734	0.4777	0.9936	0.9593	0.4631	0.9625
TCGA-XR-A8TD	1030	0	0.9625	0.8896	0.0552	0.9146	0.6822	0.9538	0.9781	0.9756	0.8703	0.8687	0.986	0.8285	0.9895	0.649	0.9624	1	0.5657	0.9868	0.8594	0.9837	0.586	0.8752	0.9448	0.98	0.9202	0.9551	0.6633	0.0336	0.9664	0.6262	0.3904	0.4895	0.8738	0.4316	0.6581	0.3419	0.7103	0.302	0.8987	0.8304	0.6079	0.937	0.5259	0.9831	0.7747	0.7163	0.9363
TCGA-DD-AACE	2184	0	0.9834	1	0.0568	0.9417	0.9212	0.9858	0.9984	0.9924	0.95	1	1	0.8158	1	0.6147	0.997	1	0.9304	1	0.9722	0.9918	0.9865	1	0.986	0.9867	0.8469	1	0.7447	0.0386	0.9614	0.8001	0.0921	0.5301	0.9761	0.3075	0.1242	0.8758	0.9237	0.3945	0.8281	0.9708	0.8196	0.9002	0.6805	1	0.9632	0.8547	0.9824
TCGA-ZS-A9CD	1386	1	0.9819	0.9712	0.0462	0.9232	0.9033	0.9809	0.9962	0.9838	0.9018	0.9564	0.9915	0.8934	1	0.7476	0.9884	1	0.829	0.9966	0.9741	0.9632	0.8227	0.9054	0.9166	0.9492	0.8702	0.9528	0.7838	0.0358	0.9642	0.6029	0.0982	0.655	0.955	0.38	0.3761	0.6239	0.899	0.3046	0.8355	0.8419	0.7881	0.9654	0.5991	1	0.9229	0.7569	0.9917
TCGA-DD-A1EC	602	0	0.9626	0.9957	0.0297	0.8911	0.6729	0.9894	0.999	0.9836	0.9001	0.9814	1	0.6213	0.9886	0.4121	0.9968	1	0.7965	0.9964	0.9788	0.9799	0.8463	1	0.9602	0.9775	0.7833	0.9411	0.4328	0.0469	0.9531	0.6968	0.1009	0.6642	0.9689	0.4455	0.686	0.314	0.8645	0.2391	0.9112	0.5519	0.5188	0.9719	0.6221	1	0.9038	0.8091	0.978
TCGA-KR-A7K8	906	0	0.9897	0.9246	0.0704	0.8239	0.5827	0.9826	0.9921	0.9911	0.958	0.9098	0.9839	0.7753	1	0.8065	0.981	1	0.6439	0.9859	0.8107	0.9803	0.9689	0.8061	0.9211	0.9802	0.8443	0.9751	0.451	0.0331	0.9669	0.4444	0.1656	0.5675	0.9634	0.3014	0.4892	0.5108	0.9028	0.368	0.9248	0.8853	0.8323	0.9522	0.5039	1	0.7827	0.6004	0.9468
TCGA-BC-4073	352	0	0.9411	0.9439	0.0589	0.9767	0.8114	0.9705	0.9809	0.9627	0.736	0.814	1	0.884	0.9939	0.6519	0.9878	1	0.4952	0.9865	0.9459	0.9742	0.2842	1	0.9515	0.9585	0.9048	0.9581	0.4263	0.0889	0.9111	0.7473	0.1932	0.6417	0.9333	0.3821	0.5341	0.4659	0.8003	0.371	0.7235	0.0785	0.5715	0.8396	0.7224	0.9772	0.9202	0.579	0.9247
TCGA-2Y-A9GY	757	1	0.8613	0.6836	0.1739	0.8691	0.3034	0.9644	0.9956	0.9604	0.7916	0.6479	0.9889	0.671	0.9713	0.3111	0.9521	1	0.4428	0.8867	0.7529	0.8426	0.5052	0.8809	0.7755	0.9553	0.7003	0.8901	0.1137	0.0627	0.9373	0.7605	0.2681	0.8545	0.8936	0.2935	0.9299	0.0701	0.5342	0.0749	0.8592	0.5558	0.3811	0.9201	0.3896	1	0.7533	0.3823	0.9579
TCGA-DD-A116	1622	1	0.9391	0.9915	0.0419	0.9612	0.8082	0.9751	0.9936	0.9875	0.8594	0.9752	0.977	0.528	1	0.2895	0.9841	1	0.7688	0.9889	0.9558	0.9774	0.7403	0.7038	0.9092	0.9262	0.8884	1	0.6094	0.0222	0.9778	0.5521	0.0884	0.5661	0.9573	0.3444	0.2541	0.7459	0.6974	0.2229	0.8323	0.7732	0.5469	1	0.4318	1	0.8658	0.7751	0.9844
TCGA-DD-AACV	1531	0	0.8937	0.9417	0.0982	0.9842	0.7014	0.9493	1	0.9919	1	0.9547	0.9577	0.8089	0.9906	0.5539	0.9685	1	0.63	0.9889	0.873	0.9461	0.8978	0.7854	0.8847	0.9277	0.727	1	0.3797	0.0562	0.9438	0.6881	0.3966	0.7166	1	0.2895	0.5399	0.4601	0.5081	0.2569	0.9106	0.9346	0.5037	0.8557	0.4861	1	0.8627	0.5984	0.9764
TCGA-ED-A7PY	390	0	0.975	0.9071	0.0609	0.773	0.7965	0.9688	0.9994	0.9871	0.9383	0.8737	1	0.6549	0.9522	0.482925	0.9915	1	0.6529	0.9883	0.9272	0.8654	0.89704	1	0.8987	0.9404	0.8905	0.9755	0.5026	0.021	0.979	0.3355	0.1155	0.7037	1	0.2264	0.3062	0.6938	0.8458	0.354	0.79652	0.7371	0.6714	0.9382	0.5547	1	0.9414	0.5511	0.9576
TCGA-DD-A1EG	1372	1	0.9047	0.7929	0.0523	0.9873	0.5371	0.9409	0.9882	0.9776	0.8744	0.7016	0.9696	0.8329	0.9851	0.5432	0.9668	1	0.55	0.9471	0.8154	0.9648	0.8782	0.6176	0.9054	0.9604	0.8253	0.9718	0.2883	0.0433	0.9567	0.6954	0.1206	0.6611	0.9769	0.3161	0.7903	0.2097	0.6781	0.0651	0.7145	0.8324	0.3827	0.975	0.4314	0.9912	0.6937	0.5641	0.9427
TCGA-PD-A5DF	639	1	0.9487	0.9316	0.0427	0.9645	0.635	0.9899	0.9301	0.973	0.8128	0.9149	0.9797	0.6826	1	0.6481	0.9859	1	0.6484	0.9945	0.9072	0.9773	0.7901	0.8527	0.8749	0.9403	0.6821	1	0.4864	0.0285	0.9715	0.5299	0.1309	0.633	0.9632	0.201	0.5854	0.4146	0.832	0.2221	0.8966	0.6489	0.5469	0.9389	0.4315	0.9792	0.8648	0.6745	0.9561
TCGA-G3-A5SL	621	0	0.9929	0.9778	0.0225	0.9771	0.9071	0.9773	0.9994	0.9969	0.9759	0.9648	0.9935	0.8603	1	0.4939	0.9726	1	0.8099	0.993	0.9606	0.9803	0.9833	0.9615	0.9263	0.9592	0.9143	0.9283	0.7921	0.0352	0.9648	0.6834	0.0802	0.6469	0.9706	0.1794	0.2806	0.7194	0.8855	0.4886	1	0.9874	0.866	0.9891	0.4868	1	0.8523	0.7398	0.9853
TCGA-WX-AA47	556	1	0.9815	0.9586	0.0159	0.8707	0.3797	0.9978	0.998	0.981	1	0.9545	0.9857	0.7097	1	0.25	0.9788	1	0.4264	1	0.9826	0.9653	0.3097	0.9041	0.9105	0.9485	0.9071	0.9809	0.2255	0.0559	0.9441	0.2843	0.0405	0.7936	0.9256	0.538	0.8283	0.1717	0.8941	0.1695	0.78285	0.7539	0.5891	0.9677	0.2189	1	0.9238	0.5241	0.9858
TCGA-DD-A4NN	899	1	0.8673	0.9717	0.0526	0.9201	0.8913	0.9804	0.9964	0.9911	0.942	0.8431	0.9925	0.7512	0.9845	0.4815	0.9905	1	0.7364	0.9808	0.9062	0.9411	0.916	0.9395	0.9317	0.9632	0.828	0.963	0.7465	0.03	0.97	0.8	0.1721	0.7134	0.9475	0.4784	0.7507	0.2493	0.8804	0.2855	0.8954	0.8487	0.3066	0.9664	0.2426	0.9946	0.9044	0.6769	0.9643
TCGA-DD-AAVX	1718	0	0.9937	0.9901	0.0331	0.9568	0.7962	0.9956	0.9967	1	1	0.978	1	0.8381	1	0.7336	0.9836	1	0.8513	1	0.9666	0.9967	0.9351	1	0.9568	0.9585	0.8574	1	0.7875	0.0114	0.9886	0.6302	0.0684	0.6182	1	0.2801	0.382678	0.61148	0.6199	0.2737	0.876	0.9726	0.9216	0.9935	0.5753	1	0.8867	0.7553	0.9732
TCGA-DD-AACT	1562	0	0.938	0.992	0.0556	0.968	0.8383	0.9928	0.9874	0.9767	1	0.9324	0.9722	0.8033	1	0.8065	0.9852	1	0.8154	1	0.885	0.9866	0.7177	0.8548	0.9872	0.9568	0.8581	1	0.6141	0.0626	0.9374	0.8368	0.1121	0.5882	1	0.3097	0.4836	0.5164	0.7803	0.2878	0.8029	0.971	0.6776	0.9217	0.6174	1	0.8644	0.8426	0.9666
TCGA-BC-A3KG	498	0	0.9488	0.9768	0.0531	0.9495	0.6138	0.9235	0.7944	0.9545	0.937	0.9494	0.9865	0.7995	0.9746	0.4691	0.996	1	0.6731	0.9564	0.9175	0.974	0.5561	0.9305	0.9436	0.946	0.9217	1	0.3022	0.0984	0.9016	0.5605	0.1618	0.7664	0.9706	0.5747	0.8242	0.1758	0.7128	0.0525	0.9487	0.9097	0.5032	0.9776	0.7461	0.9859	0.9621	0.7024	0.8109
TCGA-BC-A5W4	547	1	0.9034	0.8628	0.0382	0.8531	0.4422	0.9823	1	0.9933	1	0.9194	0.9852	0.535	0.9904	0.6769	0.9854	1	0.3987	0.9739	0.804	0.9918	0.5095	0.8008	0.8378	0.9277	0.8803	0.9447	0.2572	0.0219	0.9781	0.4861	0.1624	0.7102	1	0.4855	0.2058	0.7942	0.8546	0.1432	0.5623	0.9636	0.3382	0.9345	0.4075	1	0.851	0.5586	0.9786
TCGA-2Y-A9GZ	848	1	0.9949	0.9896	0.0337	0.9803	0.9141	0.9867	1	1	0.9351	0.992	0.9917	0.9148	1	0.7135	0.9836	1	0.8457	0.9968	0.9721	0.8902	0.9387	0.9702	0.8439	0.9819	0.8569	0.9738	0.7308	0.0417	0.9583	0.6862	0.1492	0.6707	1	0.3128	0.1092	0.8908	0.7853	0.5224	0.8825	0.9798	0.9331	0.9752	0.5469	0.993	0.9336	0.6745	0.9903
TCGA-DD-A3A3	535	1	0.9163	0.9041	0.0321	0.9289	0.7389	0.9788	0.9978	0.9716	0.8986	0.8208	0.983	0.648	1	0.4419	0.9843	1	0.4505	0.9872	0.9527	0.9098	0.7715	0.7999	0.8803	0.9402	0.7444	0.9833	0.2832	0.0862	0.9138	0.7716	0.1556	0.5665	0.9221	0.201	0.6352	0.3648	0.818	0	0.5464	0.9135	0.4812	0.9467	0.2227	1	0.8847	0.5658	0.9542
TCGA-DD-A39Z	601	1	0.9775	0.973	0.04	0.9395	0.8472	0.9977	0.9951	0.9706	1	0.9521	0.9962	0.8946	1	0.560338	1	1	0.8734	0.9976	0.9836	0.9629	0.8451	0.9715	0.9317	0.9887	0.9335	1	0.6938	0.0344	0.9656	0.6204	0.1379	0.6604	1	0.3503	0.6637	0.3363	0.9229	0.2968	0.8749	1	0.7162	0.9645	0.5285	1	0.8861	0.8109	0.9905
TCGA-DD-A73C	701	0	0.9977	0.9911	0.026	0.9774	0.8147	0.9986	0.9742	0.9928	0.9057	0.9737	0.9904	0.8381	0.9954	0.6257	0.9922	1	0.8324	0.9896	0.984	0.9899	0.9393	0.9323	0.9634	0.9928	0.8796	0.9696	0.6424	0.078	0.922	0.4664	0.1431	0.6791	0.9547	0.3829	0.104	0.896	0.8776	0.3468	0.876	0.9395	0.9548	0.8472	0.8097	1	0.933	0.7607	0.9923
TCGA-MI-A75G	698	0	0.9489	0.9362	0.0397	0.99	0.8216	0.9864	0.9669	0.9924	0.9515	0.8712	1	0.8787	0.99	0.6835	0.9888	1	0.8244	0.9948	0.93	0.9877	0.9601	1	0.8695	0.9843	0.8583	0.9645	0.5257	0.0511	0.9489	0.5298	0.0954	0.7969	0.984	0.3149	0.2064	0.7936	0.8375	0.2478	1	0.9079	0.4739	0.9194	0.6617	1	0.9051	0.7933	0.9909
TCGA-G3-A25V	860	0	0.9622	0.9494	0.0453	0.968	0.7753	0.9894	0.9881	0.9874	0.8399	0.904	0.9945	0.8318	0.9735	0.8108	0.9921	1	0.8018	1	0.9688	0.9846	0.8192	0.9707	0.9412	0.9527	0.7694	1	0.5908	0.0835	0.9165	0.5694	0.0803	0.5217	0.9596	0.3723	0.534	0.466	0.9548	0.3798	0.8603	0.8357	0.5971	0.9736	0.7276	0.9894	0.9285	0.6822	0.9672
TCGA-KR-A7K0	65	1	0.9793	0.994	0.0626	0.9129	0.7332	0.9862	0.984	0.9931	0.9002	0.9932	1	0.8172	1	0.6235	0.9932	0.8861	0.6958	0.9949	0.9758	0.9646	0.7634	1	0.95	0.9371	0.9334	1	0.5669	0.054	0.946	0.5075	0.1668	0.699	0.9669	0.311	0.6774	0.3226	0.8299	0.214	1	0.8474	0.7091	0.9679	0.6104	1	0.9188	0.795	0.965
TCGA-LG-A9QC	425	0	0.9962	0.9888	0.0332	0.9792	0.813425	0.9871	0.9877	1	1	0.9812	0.9886	0.9146	1	0.5709	0.9861	1	0.8372	1	0.9834	0.9736	0.9487	0.9298	0.9581	0.9742	0.9192	0.9575	0.8252	0.0612	0.9388	0.3037	0.1715	0.671	0.9648	0.2861	0.0882	0.9118	0.8648	0.455	0.7713	0.8645	0.9294	0.9546	0.726	1	0.9458	0.7804	0.9801
TCGA-LG-A6GG	387	0	0.9465	0.8526	0.0584	0.9433	0.6159	0.9852	0.9969	0.9801	0.9591	0.8461	0.9715	0.6819	1	0.6784	0.9594	1	0.588	0.9762	0.9272	0.9417	0.9353	0.8827	0.828	0.9563	0.7937	1	0.3387	0.0336	0.9664	0.4849	0.1013	0.6338	0.8651	0.4067	0.2238	0.7762	0.7998	0.2345	0.8014	0.9565	0.438	0.8634	0.4291	0.9918	0.8572	0.5223	0.9233
TCGA-BC-A112	153	1	0.9135	0.8909	0.0651	0.9938	0.2513	0.9582	0.9814	0.9702	0.9218	0.7063	0.9929	0.5298	1	0.5751	0.9845	1	0.3308	0.9212	0.853	0.9865	0.635	0.9514	0.8672	0.8875	0.8618	0.9654	0.0891	0.4085	0.5915	0.3896	0.0946	0.5221	0.977	0.2099	0.659	0.341	0.797	0.1642	1	0.2734	0.4074	0.9559	0.3173	0.9887	0.8354	0.4286	0.8266
TCGA-RG-A7D4	1098	0	0.6745	0.6684	0.101	0.9213	0.1514	0.9479	0.9994	0.9648	0.7751	0.4591	0.9802	0.6635	0.985	0.2811	0.9758	1	0.3041	0.8727	0.697	0.9199	0.8411	0.659	0.8072	0.9263	0.8481	0.9104	0.0306	0.0315	0.9685	0.581	0.0829	0.5434	0.9796	0.3861	0.9242	0.0758	0.6645	0.0981	1	0.8998	0.0885	0.8349	0.5153	0.9812	0.7617	0.3933	0.8798
TCGA-2Y-A9GT	1624	1	0.9924	1	0.0933	0.9738	0.9192	0.9943	0.9958	1	0.9601	1	0.9821	0.7782	1	0.7224	0.9823	1	0.8457	1	0.9532	0.9708	0.7527	0.9515	0.8651	0.9503	0.8776	0.9703	0.7995	0.0333	0.9667	0.7902	0.1124	0.6019	0.9877	0.288	0.1095	0.8905	0.7956	0.5955	0.8436	0.9747	0.899	0.9513	0.6314	0.9923	0.9564	0.7906	0.9864
TCGA-G3-A25Y	452	1	0.9481	0.9354	0.0587	0.9883	0.7639	0.9847	0.9689	0.9948	0.9313	0.8984	0.9918	0.7588	1	0.5805	0.9891	1	0.8297	0.9933	0.9506	0.8887	0.7617	0.9376	0.9195	0.9775	0.9276	0.9092	0.5307	0.0278	0.9722	0.6218	0.2468	0.7164	0.9617	0.3763	0.5587	0.4413	0.7744	0.2918	0.9111	0.5553	0.6088	0.9518	0.5477	1	0.8822	0.5092	0.9629
TCGA-DD-A3A2	2131	1	0.9982	0.9937	0.0256	0.952	0.8504	0.9969	0.9984	1	1	0.9883	1	0.9252	1	0.7505	0.9858	1	0.9196	0.992	0.9944	0.9895	0.9343	1	0.9739	0.9882	0.9508	0.9888	0.7846	0.0433	0.9567	0.4617	0.0503	0.5728	1	0.4432	0.2673	0.7327	0.7929	0.3031	1	0.992	0.9684	0.9698	0.6948	1	0.8261	0.9407	0.9933
TCGA-EP-A3RK	363	0	0.8669	0.9269	0.0547	0.8997	0.4861	0.9544	0.9897	0.9749	0.9268	0.6967	0.9717	0.627	1	0.2901	0.9779	1	0.3327	0.9677	0.8274	0.9734	0.7966	0.7031	0.945	0.9016	0.6236	0.9249	0.2023	0.0373	0.9627	0.6893	0.1281	0.767	0.9901	0.3992	0.9415	0.0585	0.8396	0	0.7181	0.7076	0.3754	0.9608	0.4277	1	0.7461	0.4554	0.9841
TCGA-ED-A459	408	0	0.857	0.9784	0.1547	0.9829	0.5487	0.9765	0.9547	0.9594	0.767	0.9019	0.9558	0.5942	0.9909	0.3562	0.9868	1	0.442	0.9677	0.8389	0.9839	0.5896	0.7305	0.9756	0.9656	0.6395	0.9352	0.3819	0.0301	0.9699	0.572	0.1833	0.6436	0.9522	0.61	0.7687	0.2313	0.8684	0.0969	0.6126	0.3817	0.3453	0.9441	0.3471	0.971	0.7937	0.5785	0.9868
TCGA-BC-A217	421	0	0.9732	0.9457	0.0712	0.8979	0.8248	0.9796	0.9972	0.9833	0.8407	0.9088	0.988	0.8342	0.9841	0.6818	0.9779	1	0.7527	0.9724	0.8959	0.9685	0.5265	0.9018	0.9226	0.9669	0.8928	0.9538	0.6215	0.0414	0.9586	0.7341	0.2656	0.6969	0.9787	0.274	0.4899	0.5101	0.8173	0.4992	0.794	0.5962	0.7105	0.9579	0.5206	1	0.9421	0.6859	0.9162
TCGA-FV-A2QQ	729	0	0.9812	0.9567	0.032	0.9938	0.9212	0.9557	0.9987	0.9842	1	0.8964	0.9958	0.7753	0.9844	0.6966	0.9756	1	0.5656	0.9839	0.9569	0.9875	1	0.9722	0.9502	0.9538	0.8969	0.9792	0.7542	0.0697	0.9303	0.4482	0.0066	0.5711	0.9454	0.2644	0.6548	0.3452	0.8254	0.3574	0.7845	0.8781	0.7778	0.9823	0.7651	1	0.8557	0.8034	0.9549
TCGA-HP-A5N0	752	1	0.9872	0.99	0.0392	0.8724	0.874878	0.9981	0.991	1	1	0.9864	1	0.8504	1	0.791	1	1	0.8817	0.9975	0.9905	0.9524	0.9656	1	0.9561	0.9627	0.8501	0.9684	0.8178	0.0412	0.9588	0.5437	0.1133	0.662	0.9942	0.4343	0.0373	0.9628	0.8951	0.1388	0.966	0.9166	0.7704	0.9678	0.5696	0.9959	0.9313	0.8452	0.9866
TCGA-DD-A114	1149	1	0.6864	0.6484	0.0542	0.9781	0.6484	0.9451	0.982	0.9838	0.78	0.6899	0.978	0.76351	1	0.3984	0.9824	1	0.8051	0.9722	0.6179	0.9871	0.7239	0.534	0.8449	0.9285	0.5718	0.9657	0.3466	0.0711	0.9289	0.6032	0.1573	0.8039	0.9578	0.3555	0.5697	0.4303	0.8606	0.2525	0.8709	0.2691	0.1947	0.9513	0.4002	1	0.8852	0.3122	0.9373
TCGA-ED-A7XO	427	0	0.947	0.943	0.0387	0.9592	0.69858	0.9956	0.9701	0.9694	0.8902	0.9259	0.9871	0.8332	1	0.6941	0.986	1	0.7993	0.9969	0.9492	0.98	0.9101	0.8693	0.9136	0.9662	0.8064	0.8644	0.8028	0.0454	0.9546	0.5517	0.2915	0.6527	1	0.236	0.4026	0.5974	0.8593	0.7755	0.8709	0.8744	0.6703	0.9362	0.6032	1	0.8834	0.7284	0.9768
TCGA-CC-A8HS	300	1	0.9069	0.8353	0.1407	0.9366	0.412	0.954	0.993	0.9784	0.9435	0.7068	0.9875	0.742	0.9515	0.489	0.9833	1	0.632	0.931	0.7427	0.9549	0.4822	0.9432	0.9219	0.8686	0.7237	0.8221	0.2299	0.0392	0.9608	0.8627	0.4188	0.7237	0.9658	0.5226	0.8097	0.1903	0.7999	0.2162	0.7675	0.5392	0.4938	0.9533	0.6362	1	0.7214	0.4841	0.9525
TCGA-DD-AADB	1242	0	0.7159	0.774	0.0632	0.9067	0.3407	0.9555	0.9715	0.9815	0.826	0.5319	0.9786	0.5586	0.9881	0.6761	0.9688	1	0.5419	0.947	0.8135	0.945	0.8295	0.8096	0.9	0.9034	0.7662	0.9676	0.1973	0.1016	0.8984	0.8565	0.2281	0.726	0.9766	0.3951	0.6827	0.3173	0.7168	0.0972	0.8376	0.4427	0.1612	0.924	0.5216	1	0.7822	0.3826	0.9698
TCGA-DD-AADA	1233	0	1	1	0.027	0.8565	0.9265	0.9796	0.9971	0.9958	1	1	0.9633	0.8869	0.9861	0.7945	0.9888	1	0.7866	0.9942	0.9251	0.9412	0.9688	0.8897	0.984	0.975	0.9429	0.9217	0.744	0.039	0.961	0.3935	0.035	0.3822	0.9494	0.3129	0.1604	0.8396	0.8365	0.6358	0.8525	0.9064	1	0.931	0.793	1	0.9687	0.8572	0.965
TCGA-FV-A3R2	194	1	0.9637	0.909	0.0582	0.9632	0.804	0.9847	0.9982	0.9961	0.8786	0.8562	0.9758	0.736	1	0.521	0.9965	0.9483	0.7037	0.9893	0.9038	0.9492	0.9102	0.8057	0.8771	0.9801	0.7799	0.8907	0.6768	0.0268	0.9732	0.8693	0.1076	0.736	0.9872	0.2896	0.4983	0.5017	0.8556	0.2402	0.843	0.9592	0.6566	0.9434	0.416	1	0.8539	0.537	0.9893
TCGA-DD-AAD1	564	0	0.9694	0.969	0.0361	0.9334	0.7325	0.9852	0.9955	0.9749	0.9012	0.9364	0.9935	0.8359	1	0.5609	0.987	1	0.6899	0.9864	0.9655	0.922	0.7827	0.9549	0.9544	0.9534	0.7847	0.9584	0.641	0.0561	0.9439	0.7056	0.056	0.486	0.9653	0.2352	0.4338	0.5662	0.9724	0.5164	0.7619	0.4596	0.5629	0.9249	0.5757	1	0.9419	0.6705	0.9547
TCGA-BD-A3EP	409	0	0.9312	0.89	0.0644	0.9487	0.6585	0.9849	0.9978	0.9698	0.779	0.8536	0.9924	0.6572	0.9931	0.5297	0.9798	1	0.5477	0.9759	0.9238	0.9833	0.8636	0.9596	0.8452	0.9692	0.8413	0.9585	0.6334	0.0488	0.9512	0.6563	0.1444	0.6173	0.9811	0.255	0.3998	0.6002	0.8009	0.5628	0.729	0.6139	0.5151	0.9727	0.6057	1	0.8189	0.7337	0.9394
TCGA-DD-AAVV	2455	0	0.7453	0.7017	0.0992	0.9826	0.1131	0.9253	0.9867	0.9635	0.786	0.4754	0.9512	0.7018	0.9438	0.7115	0.9721	1	0.3859	0.9766	0.641	0.9922	0.8601	0.5912	0.8939	0.9377	0.7832	0.971	0.0578	0.0495	0.9505	0.5452	0.2226	0.649	0.9757	0.394	0.6619	0.3381	0.66	0.1144	0.743	0.7177	0.1633	0.8275	0.5173	1	0.7917	0.5507	0.9051
TCGA-ED-A66X	406	0	0.8431	0.9585	0.054	0.9476	0.9108	0.9256	0.9973	0.9699	0.7388	0.8884	0.9837	0.8316	0.9735	0.7315	0.9865	1	0.6794	1	0.873	0.9121	0.7556	0.8959	0.9541	0.8947	0.8117	1	0.7983	0.0565	0.9435	0.7759	0.2138	0.5277	0.9674	0.5353	0.657	0.343	0.7263	0.3861	0.7463	0.4322	0.3941	0.9636	0.6074	0.9956	0.7588	0.4618	0.957
TCGA-DD-A4NP	3104	0	1	0.9967	0.03	0.9053	0.8944	0.9936	0.9995	0.9939	1	0.9944	1	0.7872	1	0.5103	0.9906	1	0.8672	0.9972	0.9919	0.9878	0.9367	1	0.9713	0.9878	0.9385	0.9779	0.7329	0.0243	0.9757	0.2261	0.0727	0.7	0.9357	0.3122	0.0864	0.9136	0.892	0.437	1	0.985	1	0.9472	0.6762	1	0.9117	0.8518	0.9898
TCGA-DD-AADL	636	0	0.9224	0.8434	0.1108	0.9336	0.7131	0.9798	0.9987	0.9883	0.9568	0.7815	1	0.7124	0.9844	0.5607	0.9969	1	0.8297	0.9941	0.8841	0.9674	0.59	1	0.9136	0.9676	0.7662	0.9913	0.4225	0.0266	0.9734	0.8431	0.1364	0.7141	0.9774	0.2805	0.3039	0.6961	0.7997	0.3313	0.8173	0.9761	0.5516	0.9102	0.582	0.9943	0.7505	0.6116	0.9761
TCGA-UB-AA0U	327	0	0.9874	0.9839	0.054	0.982	0.8745	0.9948	0.9733	1	0.9398	0.9466	1	0.9149	1	0.5901	0.997	1	0.8983	0.9871	0.9314	0.8939	0.8412	1	0.9651	0.9539	0.8333	0.9865	0.7609	0.0283	0.9717	0.714	0.1653	0.6625	0.9505	0.3502	0.6057	0.3943	0.8195	0.2383	0.9272	0.855	0.7969	0.9883	0.51	1	0.873	0.8779	0.982
TCGA-DD-A73A	728	0	0.9966	0.9815	0.0372	0.9425	0.8962	0.9972	0.9689	1	0.8587	0.9752	0.9824	0.7223	1	0.7625	0.985	1	0.8162	0.9884	0.9868	0.958	0.7947	0.9494	0.8581	0.9697	0.8476	0.9337	0.6523	0.0482	0.9518	0.6686	0.0651	0.5772	0.9246	0.3066	0.5122	0.4878	0.9002	0.645	0.9035	0.9701	0.8927	0.9435	0.7314	1	0.9102	0.8222	0.9601
TCGA-MR-A520	229	0	0.9939	0.9898	0.0327	0.9696	0.8703	0.9985	0.9004	0.9888	0.9028	0.9886	0.9892	0.8288	1	0.6395	0.9961	1	0.8923	1	0.9872	0.9742	0.9666	0.9032	0.9716	0.9952	0.8457	0.9622	0.6001	0.0191	0.9809	0.6196	0.1819	0.6709	0.9854	0.3439	0.1147	0.8853	0.7921	0.1236	1	0.9357	0.9114	0.9783	0.7574	1	0.8888	0.8191	0.9949
TCGA-CC-A8HT	140	1	0.419	0.0894	0.1647	0.8224	0.0304	0.7518	0.9295	0.9466	0.6934	0.2094	0.9158	0.2699	1	0.2857	0.9224	1	0.2599	0.8228	0.2899	0.8512	0.243	0.5502	0.4791	0.875	0.6548	0.813	0.0296	0.1121	0.8879	0.6615	0.3374	0.7588	0.8061	0.4972	0.9241	0.0759	0.6463	0.0514	0.8181	0.6642	0.0423	0.6163	0.3804	1	0.767	0.1449	0.9098
TCGA-DD-AACQ	432	1	0.9857	0.9405	0.0594	0.8409	0.7134	0.985	0.9981	0.9924	0.9165	0.8931	0.9909	0.8565	0.9774	0.6742	0.9916	1	0.6991	0.9964	0.9047	0.9563	0.9274	0.9647	0.916	0.9765	0.862	0.9924	0.5447	0.0323	0.9677	0.765	0.0708	0.4992	0.9667	0.2766	0.7114	0.2886	0.9162	0.5213	0.8619	0.9642	0.8313	0.937	0.563	0.9898	0.8308	0.6136	0.9589
TCGA-DD-AADJ	1066	0	0.9562	0.9725	0.0226	0.835	0.737	0.9986	0.9985	0.9911	0.9268	0.9348	0.9963	0.7598	1	0.7812	1	1	0.7264	0.9916	0.9627	0.8923	0.5993	0.9623	0.9352	0.9839	0.9367	0.949	0.4883	0.0271	0.9729	0.4726	0.082	0.5772	1	0.2382	0.5116	0.4884	0.974	0.1906	0.80598	0.8532	0.5495	0.9047	0.7688	1	0.9638	0.6975	0.9699
TCGA-DD-A3A5	3125	1	0.9927	0.9327	0.0254	0.8042	0.9101	0.9884	0.9963	0.9838	0.8595	0.9392	0.971	0.8895	1	0.7945	0.9934	1	0.9183	0.994	0.9538	0.9828	1	0.559	0.8334	0.9586	0.8377	0.9895	0.6008	0.0322	0.9678	0.452	0.1026	0.5939	0.9488	0.305	0.2897	0.7103	0.8723	0.5064	0.8912	0.9281	0.8889	0.99	0.5204	1	0.8395	0.7447	0.9746
TCGA-BC-A216	1351	0	0.8723	0.904	0.0641	0.9061	0.5813	0.9755	0.9895	0.9819	0.8458	0.8287	0.9791	0.6758	1	0.4424	0.9604	1	0.676	0.9685	0.8911	0.9701	0.6065	0.8914	0.8851	0.9411	0.6636	0.9067	0.3312	0.0544	0.9456	0.7908	0.2424	0.6872	0.9389	0.2985	0.5365	0.4635	0.8364	0.1237	0.624	0.8385	0.3796	0.9138	0.6017	1	0.8168	0.551	0.9569
TCGA-DD-A118	3437	0	0.9691	0.991	0.0359	0.847	0.6441	0.9848	0.9982	0.9886	0.8683	0.9603	0.9961	0.8902	0.9968	0.6895	0.9912	1	0.5547	0.9817	0.9633	0.9645	0.9114	0.92515	0.9436	0.9508	0.9285	0.9387	0.4045	0.0281	0.9719	0.5535	0.0562	0.623	0.9855	0.2499	0.263	0.737	0.8258	0.3055	0.8816	0.9328	0.7106	0.93	0.3207	1	0.8769	0.3787	0.9864
TCGA-K7-A5RF	631	0	0.9941	0.9943	0.0245	0.9378	0.9168	0.9953	0.9925	0.9945	1	0.9916	0.9936	0.9252	0.9882	0.8285	0.9924	1	0.8912	0.9903	0.9883	0.9901	0.9402	0.9445	0.9573	0.9838	0.9339	0.9821	0.7167	0.0163	0.9837	0.4538	0.062	0.6186	0.9877	0.3079	0.0295	0.9705	0.9624	0.4264	0.8327	0.889	0.9188	0.9258	0.8472	0.9915	0.9743	0.8065	0.988
TCGA-DD-AADP	458	0	0.9585	0.9421	0.0462	0.9273	0.7242	0.9747	0.9699	0.9758	0.951	0.8833	0.9862	0.7462	1	0.7991	0.9909	1	0.6452	0.983	0.9662	0.9345	0.9385	0.934	0.8359	0.9265	0.72	0.9593	0.6701	0.0174	0.9826	0.5529	0.1525	0.6406	0.9575	0.2444	0.2346	0.7654	0.5316	0.7089	0.8068	0.9498	0.6108	0.9172	0.6096	1	0.8613	0.5448	0.9563
TCGA-DD-A3A9	931	1	0.9333	0.9064	0.0538	0.9917	0.6558	0.9725	0.9359	0.9789	0.830475	0.6923	0.9676	0.5773	1	0.4071	0.9943	1	0.6328	0.9864	0.9248	0.9808	1	0.6065	0.9492	0.8852	0.8357	0.9741	0.3424	0.021	0.979	0.7183	0.0982	0.482	0.9604	0.5608	0.3514	0.6486	0.7006	0.1418	0.8502	0.9007	0.3254	0.8276	0.4928	0.9705	0.8427	0.7043	0.9651
TCGA-G3-A25S	416	1	0.8943	0.7857	0.1628	0.7644	0.3652	0.9572	0.9978	0.9564	0.4418	0.6018	0.9486	0.7846	0.9888	0.489887	0.9465	1	0.4303	0.9497	0.8413	0.9299	0.9397	0.4726	0.8486	0.9024	0.6669	0.9646	0.1742	0.1374	0.8626	0.8116	0.0402	0.8151	1	0.5883	0.8975	0.1025	0.5771	0.0226	0.6921	0.8126	0.4635	0.9178	0.2765	1	0.8043	0.4596	0.9604
TCGA-ZP-A9CZ	706	0	0.9416	0.985	0.0449	0.9227	0.925	0.9817	0.9968	0.9682	1	0.9474	0.9796	0.5942	0.9848	0.4997	0.9764	1	0.7988	0.9856	0.9155	0.9019	0.677	0.8337	0.9321	0.9456	0.707	0.9182	0.8159	0.0135	0.9865	0.6689	0.0734	0.6847	0.9387	0.3329	0.7487	0.2513	0.9644	0.4465	0.8239	0.772	0.5074	0.9537	0.6057	1	0.9096	0.6885	0.9258
TCGA-MI-A75I	630	0	0.9172	0.9075	0.0667	0.9846	0.8593	0.9788	0.8904	0.9888	0.8941	0.8931	0.9687	0.801	1	0.3303	0.9872	1	0.7711	0.9745	0.8645	0.956	0.791	0.729	0.9442	0.9668	0.8881	0.9525	0.674	0.0413	0.9587	0.7392	0.1509	0.6095	0.9217	0.3968	0.8363	0.1637	0.8771	0.2011	0.743	0.7954	0.4123	0.9267	0.5689	1	0.8815	0.6096	0.9538
TCGA-G3-A3CG	673	0	0.9798	0.9748	0.0402	0.8776	0.7798	0.9908	0.9955	1	1	0.9374	0.9791	0.7678	1	0.818	1	1	0.6848	0.9737	0.921	0.9896	1	0.8734	0.9472	0.9913	0.8187	0.952	0.4413	0.0217	0.9783	0.5374	0.0584	0.5347	1	0.1869	0.2595	0.7405	0.6686	0.3634	0.7799	0.9683	0.6966	0.9724	0.3867	0.987	0.8329	0.712	0.9766
TCGA-DD-AAEE	810	0	0.9517	0.9121	0.0565	0.9732	0.4989	0.9535	0.9978	0.9623	0.9406	0.8465	0.9901	0.6871	0.9927	0.4956	0.9754	1	0.4063	0.9459	0.922	0.9855	0.8446	0.9056	0.8871	0.902	0.8305	0.9764	0.2425	0.0517	0.9483	0.4243	0.11	0.6471	0.984	0.326	0.6651	0.3349	0.8096	0.2446	0.7112	0.9362	0.6158	0.9559	0.572	1	0.8327	0.6911	0.9559
TCGA-ZP-A9D4	395	0	0.9966	0.9571	0.0953	0.9261	0.7233	0.9871	0.9996	0.9786	0.8883	0.9635	0.9941	0.7531	1	0.8182	0.9769	1	0.6574	0.9911	0.9918	0.9286	0.8715	0.9459	0.8769	0.9761	0.8496	0.9814	0.4488	0.0744	0.9256	0.5848	0.1235	0.4877	1	0.1823	0.5841	0.4159	0.8884	0.3001	0.7147	0.9835	0.9538	0.9762	0.4567	0.9954	0.9573	0.7602	0.9725
TCGA-ZS-A9CE	1241	0	0.9947	0.9936	0.0231	0.9888	0.8638	1	0.9656	1	0.9785	0.987	0.9918	0.9081	1	0.6841	0.9951	1	0.7597	0.9928	0.9615	0.9882	0.9908	0.9411	0.966	0.9731	0.8769	0.9837	0.6975	0.0537	0.9463	0.24	0.0399	0.5803	1	0.299	0.2653	0.7347	0.8844	0.3889	0.9078	0.9802	0.9072	0.9709	0.2907	1	0.8976	0.8646	0.9814
TCGA-CC-5258	129	1	0.9367	0.8282	0.1386	0.9701	0.5855	0.9589	0.9868	0.9731	0.7186	0.7146	0.9871	0.9309	0.9545	0.3569	0.9684	1	0.4927	0.9647	0.7585	0.9312	0.7827	0.9132	0.8005	0.8974	0.807	0.9706	0.2915	0.1638	0.8362	0.9204	0.2113	0.8027	0.9162	0.485	0.8229	0.1771	0.5418	0.0957	0.7312	0.54	0.4831	0.9681	0.3123	0.9485	0.7692	0.42	0.9843
TCGA-G3-A25Z	655	0	0.8928	0.9507	0.0519	0.9782	0.7319	0.95	0.9929	0.9904	0.8541	0.887	0.9954	0.8756	0.9963	0.8088	0.9801	1	0.6394	0.9896	0.9749	0.9849	0.8477	0.9028	0.9385	0.9479	0.8797	0.9707	0.3685	0.0206	0.9794	0.6356	0.2443	0.6795	0.9918	0.4434	0.5277	0.4723	0.798	0.2596	0.8126	0.9426	0.4424	0.9097	0.5978	1	0.8075	0.6228	0.9839
TCGA-G3-A5SM	520	0	0.9051	0.9228	0.0543	0.9846	0.7642	0.9758	0.9915	0.9786	0.7729	0.8276	0.9796	0.7265	0.9899	0.7476	0.9921	1	0.7972	0.9914	0.9011	0.9782	0.9044	0.7509	0.9209	0.9491	0.8639	0.9349	0.6173	0.0505	0.9495	0.6226	0.1161	0.7439	0.9934	0.3875	0.7999	0.2001	0.7385	0.1125	0.8477	0.9217	0.4739	0.9539	0.2778	1	0.818	0.5906	0.9858
TCGA-CC-A7IE	217	1	0.6138	0.3978	0.1224	0.6935	0.3068	0.9045	0.9996	0.955	0.9047	0.3811	0.9883	0.5966	1	0.4784	0.9712	1	0.4473	0.8593	0.6132	0.9129	0.585	0.9303	0.7314	0.867	0.6563	0.9685	0.121	0.0567	0.9433	0.7033	0.3054	0.7469	0.9175	0.443	0.7989	0.2011	0.671	0.0451	0.7551	0.3619	0.099	0.8847	0.4377	0.8938	0.7676	0.3469	0.8553
TCGA-DD-AAED	763	0	0.9093	0.5564	0.1146	0.9151	0.6758	0.922	0.9971	0.962	0.8316	0.4799	0.9948	0.8034	0.9598	0.5455	1	1	0.6769	0.9736	0.6625	0.9334	0.3079	0.9817	0.7683	0.9518	0.7877	0.9771	0.1834	0.1074	0.8926	0.6878	0.261756	0.6365	0.9585	0.0875	0.3552	0.6448	0.5248	0.5362	0.6964	0.703743	0.3737	0.9323	0.552325	1	0.834	0.3692	0.9919
TCGA-BC-A8YO	562	0	0.9703	0.9173	0.0377	0.9289	0.9004	0.9855	0.9668	0.9833	0.9291	0.9065	0.9871	0.6758	1	0.6612	0.985	1	0.9055	0.9865	0.9764	0.8955	0.764	0.9344	0.9222	0.9542	0.9	1	0.7687	0.0986	0.9014	0.5341	0.1385	0.6201	0.947	0.2692	0.6728	0.3272	0.9281	0.5441	0.7999	0.7033	0.6214	0.9495	0.621	1	0.9553	0.6425	0.9448
TCGA-DD-AAE0	555	0	0.8617	0.6275	0.1063	0.7537	0.2784	0.9468	0.9484	0.9632	0.7723	0.5292	0.9803	0.6096	1	0.442283	0.9882	1	0.3873	0.9757	0.6254	0.9804	0.728167	0.84	0.7853	0.9457	0.7362	0.9426	0.2726	0.0581	0.9419	0.6933	0.1377	0.6457	0.9899	0.2587	0.6803	0.3197	0.8156	0.0926	0.8653	0.1167	0.2517	0.9267	0.4991	1	0.9025	0.2656	0.9729
TCGA-MR-A8JO	330	0	0.9193	0.9777	0.048	0.9086	0.403	0.9795	0.9423	0.9645	0.9193	0.8976	0.9918	0.6495	0.9879	0.3136	0.9778	1	0.6505	0.9655	0.9901	0.9479	0.6964	0.9755	0.9569	0.9059	0.7371	0.835	0.1183	0.042	0.958	0.5677	0.1576	0.7064	0.9615	0.445	0.6459	0.3541	0.7207	0.2417	1	0.4874	0.4804	0.9441	0.483	1	0.9474	0.7561	0.8272
TCGA-BC-A10S	1423	1	0.9791	0.9741	0.0352	0.9634	0.877	0.9894	0.9886	0.9923	0.9115	0.9422	1	0.8734	1	0.7622	0.9896	1	0.7954	0.9751	0.9705	0.955	0.9727	1	0.935	0.9411	0.899	1	0.7163	0.0619	0.9381	0.3174	0.0786	0.4752	0.9953	0.2615	0.0887	0.9113	0.9116	0.1956	0.8759	0.9386	0.7899	0.9804	0.4798	1	0.9272	0.8305	0.9786
TCGA-2Y-A9H3	1516	0	0.9803	0.939	0.0641	0.9435	0.7696	0.9898	0.9783	0.9719	0.8236	0.9327	0.9862	0.8895	0.9438	0.42755	0.9861	1	0.6752	0.9786	0.9473	0.9212	0.74005	0.8934	0.9319	0.9382	0.8285	0.9572	0.5835	0.0224	0.9776	0.5276	0.0411	0.6578	0.9746	0.3014	0.3692	0.6308	0.9271	0.2055	0.79022	0.853588	0.7175	0.8736	0.3135	1	0.8879	0.565	0.9511
TCGA-G3-AAV3	412	0	0.9287	0.9513	0.0695	0.9325	0.6378	0.9794	0.9911	0.9739	0.7916	0.922	0.9956	0.6102	0.9921	0.4561	0.9892	1	0.6207	0.9788	0.9677	0.9679	0.9379	0.9688	0.8957	0.9351	0.7432	0.9811	0.3691	0.0323	0.9677	0.6094	0.1681	0.7051	0.9433	0.3454	0.7385	0.2615	0.8027	0.2584	1	0.9488	0.5984	0.9523	0.2615	1	0.9061	0.6166	0.9725
TCGA-XR-A8TC	1339	0	0.9187	0.9406	0.0375	0.8635	0.7577	0.9628	0.9993	0.9774	0.9207	0.8233	0.9928	0.7487	1	0.7192	0.9869	1	0.7866	0.9897	0.9778	0.9059	0.9102	0.9663	0.8904	0.9356	0.8334	1	0.5915	0.0238	0.9762	0.5984	0.1216	0.6143	0.973	0.3731	0.5384	0.4616	0.8346	0.3169	0.9497	0.8115	0.3224	0.958	0.4945	0.9828	0.9359	0.6681	0.9447
TCGA-G3-A3CH	780	0	0.9689	0.9725	0.0281	0.9845	0.7667	0.9773	0.9982	0.9951	1	0.9488	0.9954	0.8285	1	0.696	0.9942	1	0.7597	0.9949	0.9582	0.9455	0.9692	0.9704	0.9051	0.9799	0.8834	0.9796	0.6015	0.0303	0.9697	0.8331	0.0576	0.6836	0.9811	0.3651	0.279	0.721	0.8262	0.2765	0.7736	0.8474	0.6696	0.9311	0.5575	1	0.8952	0.673	0.9785
TCGA-DD-A4NJ	760	0	0.9577	0.9675	0.0601	0.9917	0.8612	0.9893	1	1	0.8478	0.9553	0.98	0.7857	1	0.5133	0.9925	1	0.7719	0.9864	0.9615	0.9367	0.7269	0.9454	0.9339	0.9302	0.865	0.9768	0.7577	0.0237	0.9763	0.8885	0.3519	0.7314	0.972	0.3895	0.7018	0.2982	1	0.3208	0.8837	0.8665	0.7059	0.982	0.5577	1	0.9084	0.7631	0.9594
TCGA-DD-AADQ	436	0	0.9356	0.9781	0.0564	0.9597	0.6594	0.8488	0.9953	0.9804	0.8507	0.9614	0.9907	0.2474	0.9895	0.4876	0.972	0.983912	0.517	0.9787	0.9746	0.9828	0.8736	0.9096	0.9039	0.9777	0.7121	0.9816	0.5928	0.0325	0.9675	0.521	0.1653	0.5996	1	0.2312	0.3562	0.6438	0.8083	0.3637	0.7741	0.9506	0.5558	0.9446	0.5118	1	0.916	0.6064	0.9311
TCGA-DD-AACS	1804	0	0.9519	0.8921	0.0449	0.979	0.7776	0.9823	0.9972	0.9855	0.9427	0.8126	0.9931	0.8965	1	0.7646	0.9766	1	0.6232	0.9937	0.8926	0.9704	0.952	0.9243	0.8729	0.9494	0.862	1	0.5921	0.0259	0.9741	0.6508	0.3276	0.5467	1	0.2674	0.5174	0.4826	0.8528	0.4562	0.7983	0.9223	0.4694	0.9327	0.5555	1	0.7958	0.6461	0.9743
TCGA-2Y-A9H8	633	1	1	0.9278	0.1115	0.872	0.66023	0.9844	0.9959	0.9961	0.9024	0.8629	0.9948	0.8948	0.9912	0.702	0.9946	1	0.8097	0.993	0.7967	0.9529	0.8363	0.9589	0.9394	0.9642	0.8603	0.9797	0.8769	0.0587	0.9413	0.5785	0.1156	0.6633	0.9655	0.23	0.5645	0.4355	0.7414	0.2215	0.795	0.7154	1	0.9613	0.4038	0.9966	0.7467	0.4	0.9958
TCGA-UB-A7MA	535	0	0.9813	0.9286	0.1011	0.9154	0.7892	0.9889	0.996	0.9792	0.9711	0.6549	0.9807	0.6897	1	0.6036	0.998	1	0.6779	0.9912	0.9156	0.9518	0.7283	0.9195	0.8579	0.7659	0.8701	0.8591	0.724	0.1461	0.8539	0.7817	0.21	0.8787	0.9715	0.3663	0.5922	0.4078	0.832	0.3819	0.7957	0.1544	0.7963	0.9668	0.6483	1	0.8421	0.4262	0.969
TCGA-DD-A3A1	233	1	0.9505	0.9717	0.0624	0.9351	0.4524	0.9641	0.9809	0.9958	1	0.8863	0.988	0.7753	1	0.4491	0.996	1	0.4804	0.9933	0.9621	0.9842	0.774614	0.8834	0.9627	0.9368	0.7632	1	0.2141	0.0557	0.9444	0.8713	0.2336	0.6437	0.9624	0.5641	0.6516	0.3484	0.7763	0.1747	0.6921	0.9611	0.5727	0.8283	0.4436	1	0.8297	0.6363	0.9715
TCGA-3K-AAZ8	396	0	0.9964	0.9755	0.0334	0.9938	0.8527	0.994	0.9975	0.995	1	0.9553	0.9956	0.8135	0.9943	0.7316	0.9935	1	0.8275	0.9983	0.9272	0.9921	0.8165	0.9555	0.9376	0.9803	0.8535	0.9875	0.7056	0.0281	0.9719	0.5219	0.0848	0.407	0.9443	0.21	0.134	0.866	0.9121	0.3538	0.9092	0.9586	0.9423	0.9875	0.5	1	0.8855	0.8729	0.974
TCGA-DD-A4NV	2018	0	0.9938	0.9931	0.0356	0.9309	0.7372	0.9971	0.9523	0.9929	0.9675	0.988	0.9958	0.8577	1	0.7249	0.9919	1	0.9261	1	0.933	0.9756	0.9278	0.9785	0.953	0.998	0.877	0.9622	0.5028	0.0373	0.9627	0.3976	0.1311	0.5656	1	0.3523	0.0182	0.9818	0.9676	0.5704	0.925	0.9159	0.8928	0.9463	0.6231	1	0.9501	0.6379	0.985
TCGA-FV-A23B	1852	1	0.8345	0.8766	0.0426	0.9742	0.2622	0.9895	0.9976	0.9903	0.8585	0.675	0.9925	0.5651	1	0.7514	0.9929	1	0.5697	0.9872	0.9561	0.9375	0.7952	0.9594	0.8966	0.9523	0.726	0.9494	0.1438	0.0223	0.9777	0.7271	0.165	0.6177	0.9882	0.4242	0.5847	0.4153	0.8093	0.1285	0.6509	0.8855	0.2238	0.9426	0.5774	0.9819	0.8705	0.3703	0.9631
TCGA-DD-A3A4	612	1	0.9678	0.8684	0.0329	0.9359	0.7726	0.9954	0.9975	0.9884	0.9193	0.8461	1	0.801	1	0.7441	1	1	0.7552	1	0.7653	0.9654	0.9186	1	0.9303	0.9902	0.8693	0.9338	0.5615	0.0409	0.9591	0.5365	0.1823	0.701	0.9747	0.2911	0.5328	0.4672	0.8579	0.3159	0.8653	0.98	0.5727	0.9567	0.5883	1	0.9141	0.5831	0.9928
TCGA-CC-A7IG	299	1	0.8274	0.881	0.1062	0.6538	0.8242	0.9536	0.8717	0.9757	0.7599	0.8441	0.9872	0.4706	0.9923	0.5	0.984	1	0.7262	0.9769	0.9093	0.9554	0.255	0.8803	0.8444	0.8119	0.8184	0.9612	0.5924	0.0614	0.9386	0.7922	0.1076	0.641	0.8968	0.3411	0.8539	0.1461	0.7693	0.3205	0.8179	0.3248	0.237	0.8364	0.545	0.9906	0.8299	0.5989	0.9356
TCGA-DD-A39Y	171	1	0.8275	0.5876	0.1109	0.9467	0.1113	0.9462	0.9894	0.9452	0.7277	0.6689	0.9677	0.6016	0.97	0.2065	0.9474	1	0.2957	0.9668	0.7505	0.9591	0.7442	0.4266	0.6883	0.9682	0.725	0.9614	0.1482	0.0775	0.9225	0.8291	0.2124	0.6108	0.8451	0.3762	0.9016	0.0984	0.7395	0.0764	0.6461	0.7937	0.2269	0.916	0.272	0.9543	0.6984	0.3536	0.9279
TCGA-BC-A10Q	1135	1	0.9556	0.991	0.0241	0.8789	0.8209	0.9926	0.9986	1	0.8348	0.9292	0.9955	0.8328	1	0.6627	1	0.9936	0.8025	1	0.9883	0.9185	0.6727	0.9739	0.9778	0.949	0.8962	0.9725	0.5781	0.0616	0.9384	0.657	0.0758	0.6208	0.963	0.4123	0.7835	0.2165	0.9338	0.1052	0.7634	0.1474	0.5781	0.9645	0.5777	1	0.9209	0.7092	0.9314
TCGA-DD-A4NH	690	0	0.8876	0.9549	0.0935	0.8616	0.5987	0.9549	0.9957	0.9789	1	0.9023	0.9742	0.7049	1	0.2694	0.9932	1	0.7865	0.9701	0.9906	0.8965	0.3121	0.9148	0.9227	0.952	0.7972	0.8744	0.3466	0.0318	0.9682	0.8918	0.1483	0.8083	0.9378	0.599	0.3804	0.6196	0.8318	0.1257	0.8185	0.4904	0.3904	0.9608	0.5463	0.9826	0.8835	0.4772	0.9633
TCGA-K7-AAU7	359	0	0.7998	0.8774	0.1401	0.9784	0.4946	0.9705	0.7949	0.9458	0.8487	0.7159	0.9732	0.6259	0.9891	0.48	0.9927	1	0.6067	0.9421	0.8931	0.9297	0.4554	0.9178	0.917	0.9061	0.7207	0.9407	0.4015	0.1192	0.8808	0.6853	0.2282	0.6244	0.9146	0.4442	0.7444	0.2556	0.856	0.2518	0.8159	0.3254	0.1792	0.8885	0.5826	1	0.9129	0.573	0.9067
TCGA-CC-A1HT	101	1	0.6229	0.5653	0.1924	0.9065	0.0352	0.9289	0.5869	0.9165	0.5905	0.4719	0.9336	0.5741	0.9125	0.0377	0.9669	1	0.2367	0.8341	0.7307	0.9127	0.6573	0.6077	0.8703	0.8579	0.7441	0.9257	0.0231	0.0517	0.9483	0.7949	0.3183	0.7084	0.9219	0.4804	0.8311	0.1689	0.4588	0.0323	0.6905	0.063	0.0942	0.7819	0.5526	0.9213	0.7844	0.2481	0.8569
TCGA-DD-AACW	1424	0	0.9237	0.9845	0.0276	0.889	0.7605	0.9826	0.9997	0.9932	0.9726	0.9334	0.9918	0.8151	0.9783	0.7353	0.9863	1	0.7899	0.9869	0.9693	0.9621	1	0.9441	0.9291	0.9693	0.8041	0.9313	0.4966	0.0072	0.9928	0.4791	0.168	0.6612	0.9639	0.3701	0.6051	0.3949	0.9692	0.1773	0.7869	0.8183	0.3943	0.9274	0.6075	0.9951	0.9178	0.558	0.9765
TCGA-CC-5260	87	1	0.9618	1	0.0361	0.8165	0.8281	0.9883	0.9914	0.9944	0.8799	1	1	0.742	1	0.4058	0.9954	0.9865	0.8989	1	0.9789	0.9473	0.6457	1	0.9779	0.9878	0.8296	0.9823	0.7532	0.0955	0.9045	0.4376	0.1535	0.6103	0.9731	0.446	0.6208	0.3792	0.9566	0.278	0.8774	0.0405	0.5927	0.8708	0.7012	1	0.9634	0.7363	0.9559
TCGA-DD-AAE2	638	0	0.9708	0.9586	0.0245	0.9821	0.9219	0.9865	0.9975	0.9711	0.9668	0.9394	0.996	0.8504	0.9951	0.7953	0.9786	1	0.8438	0.9779	0.938	0.9649	0.9437	0.9596	0.9006	0.9801	0.8429	0.9823	0.8112	0.0505	0.9495	0.4942	0.2114	0.5991	0.9617	0.2867	0.197	0.803	0.814	0.7311	0.9015	0.9651	0.746	0.9473	0.7571	1	0.8656	0.7165	0.985
TCGA-DD-A4NO	2245	0	0.9538	0.9727	0.0404	0.9902	0.801	0.9856	1	1	0.8837	0.9575	0.9912	0.8721	1	0.7163	0.986	1	0.7764	0.9975	0.9463	0.9796	0.9562	0.9257	0.8938	0.9802	0.9103	0.9775	0.6564	0.0247	0.9753	0.5332	0.0718	0.5958	1	0.4909	0.1642	0.8358	0.8075	0.316	0.8898	0.7395	0.5203	0.963	0.5889	1	0.8537	0.648	0.9605
TCGA-DD-AACB	2324	0	0.8204	0.7961	0.0814	0.8266	0.8311	0.9586	0.9867	0.968	0.7169	0.7557	0.9713	0.8519	1	0.1818	0.9642	1	0.6071	0.9546	0.8074	0.9847	0.8435	0.7629	0.8591	0.8318	0.8277	0.9395	0.5244	0.0259	0.9741	0.6617	0.1802	0.6702	0.9544	0.2478	0.8658	0.1342	0.6181	0.0477	0.80817	0.6867	0.266	0.9484	0.4405	1	0.8559	0.6455	0.9787
TCGA-G3-AAV0	476	0	0.9952	0.8851	0.0281	0.8735	0.6459	0.9875	0.9825	1	1	0.9087	0.9884	0.801	1	0.55785	0.9777	1	0.644	0.9989	0.9268	0.9834	0.85962	0.9456	0.8995	0.9669	0.8164	0.9824	0.4954	0.0095	0.9905	0.2438	0.063	0.6495	1	0.2444	0.0593	0.9407	0.919	0.3131	1	0.9419	0.9211	0.9854	0.5035	1	0.8707	0.5309	0.9664
TCGA-O8-A75V	538	0	0.9913	0.9766	0.0258	0.9896	0.7704	0.9783	0.9986	0.9917	1	0.9694	0.9937	0.9284	1	0.6834	0.9821	1	0.767	0.9876	0.9641	0.9778	0.9134	0.9343	0.8835	0.9697	0.8742	0.9675	0.5661	0.0791	0.9209	0.5803	0.1836	0.5492	0.9813	0.3094	0.6547	0.3453	0.911	0.2896	0.909	0.8929	0.8396	0.9788	0.3758	1	0.904	0.8057	0.9587
TCGA-CC-5263	129	1	0.9566	0.9276	0.0546	0.8809	0.8772	0.97	0.9866	0.9807	0.921	0.8604	0.9733	0.7786	0.9725	0.3676	0.9807	0.9664	0.8295	0.9904	0.9119	0.8293	0.2916	0.8923	0.93	0.9485	0.9273	0.8915	0.6686	0.0928	0.9072	0.6515	0.49	0.7126	0.959	0.5668	0.7674	0.2326	0.684	0.3315	0.8448	0.2656	0.7332	0.9336	0.6956	0.9964	0.8883	0.6178	0.9675
TCGA-DD-AAD8	1219	0	0.9593	0.7309	0.1081	1	0.634967	0.9698	0.993	0.9866	0.9543	0.7499	0.9789	0.7816	1	0.6071	0.9869	1	0.7001	0.9721	0.8082	0.9408	0.7843	0.9428	0.9242	0.9079	0.9242	0.948	0.540744	0.0932	0.9068	0.4935	0.2875	0.7087	1	0.25	0.6682	0.3318	0.7596	0.278822	0.8709	0.9654	0.7032	0.9635	0.4567	1	0.8072	0.5087	0.9409
TCGA-DD-AAD0	137	0	0.9569	0.9674	0.0465	0.9362	0.8495	0.9785	0.9523	0.9933	0.9691	0.9325	1	0.8615	1	0.5359	0.9826	1	0.7638	0.9959	0.9725	0.9491	0.8376	1	0.9542	0.9437	0.8775	0.9649	0.6975	0.0247	0.9753	0.6656	0.1765	0.6221	0.97624	0.2187	0.5033	0.4967	0.8684	0.4608	1	0.976	0.4512	0.9873	0.8285	1	0.9242	0.7288	0.9916
TCGA-CC-A3MC	363	0	0.8074	0.9111	0.0342	1	0.2212	0.9299	0.9986	0.9916	0.8891	0.8359	0.9583	0.8274	1	0.477	0.976	1	0.4477	0.9634	0.9141	0.9679	0.8684	0.6596	0.8692	0.9724	0.8771	0.9315	0.1264	0.0609	0.9391	0.4804	0.0881	0.7904	0.9383	0.3206	0.8007	0.1993	0.6848	0.0348	0.7427	0.7091	0.1244	0.9541	0.3176	1	0.8052	0.47	0.9725
TCGA-ED-A4XI	386	0	0.9976	1	0.0241	0.8604	0.8751	0.9941	0.9497	0.9923	0.9475	1	0.9848	0.8895	0.9921	0.8467	0.9976	1	0.9122	0.9942	0.9898	0.9876	0.9103	0.9473	0.994	0.9541	0.9472	0.9854	0.8318	0.0644	0.9356	0.4201	0.0551	0.6353	0.9772	0.379	0.336	0.664	0.8793	0.6269	0.8439	0.9351	0.9487	0.965	0.6985	1	0.9327	0.8319	0.9882
TCGA-G3-A5SI	768	1	0.9699	0.9682	0.0165	0.9143	0.8321	0.9919	0.9993	0.9889	0.9126	0.9067	0.9929	0.9162	1	0.8169	0.9649	1	0.8271	0.9893	0.9636	0.954	0.908	0.9213	0.9591	0.9497	0.8755	0.9177	0.7904	0.0089	0.9911	0.5152	0.2165	0.7065	0.9774	0.0935	0.7946	0.2054	0.7896	0.6999	1	0.7107	0.6563	0.9602	0.272	0.9775	0.8916	0.7788	0.9512
TCGA-DD-AAW1	1989	0	0.9894	0.9801	0.0314	0.9631	0.9079	0.997	0.9941	0.9889	1	0.9692	0.9931	0.8693	1	0.7038	0.9901	1	0.7523	1	0.9852	0.9876	0.9018	0.9736	0.9524	0.9669	0.8824	0.9887	0.7299	0.0368	0.9632	0.4684	0.031	0.6191	0.975	0.1682	0.231	0.769	0.7651	0.5173	0.8852	0.9561	0.8635	0.9796	0.7188	1	0.9182	0.8739	0.9894
TCGA-DD-A1EH	1495	0	0.9214	0.9402	0.0379	0.9529	0.3502	0.9915	0.9964	0.9947	0.9628	0.8164	0.9943	0.8573	0.9957	0.6845	0.9938	1	0.6236	0.9919	0.9554	0.933	0.9334	0.9652	0.9842	0.9813	0.9046	0.9624	0.2075	0.0656	0.9344	0.6613	0.1051	0.6329	0.9952	0.3328	0.4489	0.5511	1	0.1417	0.6462	0.6218	0.4895	0.944	0.4754	0.9886	0.9014	0.5969	0.9731
TCGA-DD-A4ND	2232	0	0.9307	0.8394	0.1057	0.9862	0.477	0.9806	0.9677	0.993	0.8031	0.7814	0.9946	0.6652	1	0.6649	0.977	1	0.589	0.9788	0.8805	0.9056	0.7934	0.9831	0.8194	0.9676	0.7162	0.9874	0.3381	0.0495	0.9505	0.715	0.3051	0.6	0.9762	0.3374	0.3759	0.6241	0.7143	0.2097	0.9514	0.5217	0.5485	0.9235	0.7265	1	0.7859	0.5098	0.9749
TCGA-DD-AAVP	2752	0	0.9831	0.988	0.0404	1	0.7955	0.9856	0.9977	0.9928	0.87614	0.977	1	0.7451	1	0.8235	0.9926	1	0.7914	1	0.979	0.9953	1	1	0.9377	0.9538	0.9674	0.9656	0.6067	0.0316	0.9684	0.43	0.1199	0.7079	0.9675	0.1524	0.4983	0.5017	0.935	0.4106	0.780078	0.9703	0.8213	0.9879	0.5555	1	0.9501	0.8529	0.9926
TCGA-DD-AAE1	552	0	0.7465	0.8129	0.0566	0.9551	0.2356	0.9221	0.9982	0.9845	0.9315	0.7422	0.9905	0.6617	0.9898	0.661	0.9932	1	0.4995	0.9472	0.8506	0.8965	0.9352	0.9253	0.8087	0.9507	0.7764	1	0.1889	0.0184	0.9816	0.9022	0.2298	0.4895	1	0.3103	0.5316	0.4684	0.6825	0.1641	0.678	0.8495	0.1458	0.9068	0.592	0.9641	0.8938	0.2583	0.9671
TCGA-DD-AADD	1231	0	0.8804	0.9105	0.1485	0.9026	0.3246	0.9791	0.9948	0.9423	0.7943	0.8668	0.9753	0.7598	0.9648	0.3377	0.9739	1	0.579	0.912	0.8052	0.9846	0.9475	0.8502	0.9864	0.9692	0.7901	0.929	0.1282	0.0475	0.9525	0.5504	0.0666	0.741	1	0.3688	0.7639	0.2361	0.787	0.0889	0.6795	0.8255	0.4517	0.906	0.6937	0.9596	0.7439	0.554	0.9755
TCGA-DD-AADI	1085	0	0.9388	0.9772	0.0353	0.8504	0.4237	0.9755	0.9987	0.9922	0.9193	0.9571	1	0.8118	0.9829	0.483844	0.9833	1	0.639	0.9953	0.9503	0.9713	0.800217	1	0.8988	0.9805	0.9326	0.9435	0.3663	0.0432	0.9568	0.5252	0.0767	0.4717	0.9874	0.1126	0.6803	0.3197	0.9178	0.2922	1	0.7064	0.4155	0.8946	0.7281	1	0.8844	0.5571	0.9438
TCGA-DD-A4NA	1008	0	0.9856	0.9891	0.049	0.9257	0.74985	0.9947	0.9927	0.9957	0.8792	0.8951	0.9945	0.8487	0.987	0.2875	1	1	0.80543	1	0.9877	0.9694	0.8072	0.9831	0.993	0.9746	0.9298	0.9681	0.8033	0.0778	0.9222	0.3807	0.1007	0.701	0.9821	0.5168	0.118	0.882	1	0.3087	0.8466	0.1494	0.672	0.9476	0.7638	1	0.9544	0.8125	0.95
TCGA-BC-A10U	837	1	0.8872	0.8545	0.2561	0.9334	0.4632	0.9292	0.9701	0.9589	0.6808	0.7533	0.9713	0.5711	0.9643	0.355	0.9625	1	0.3747	0.9874	0.8013	0.9756	0.4085	0.8835	0.902	0.9308	0.6606	0.9322	0.3046	0.0574	0.9426	0.8679	0.1226	0.7335	0.923	0.4493	0.5299	0.4701	0.4232	0.204	0.6207	0.7644	0.6234	0.8696	0.4281	0.9826	0.6154	0.2798	0.9855
TCGA-CC-A9FS	211	0	0.9143	0.8751	0.0406	0.9607	0.5257	0.9918	0.9993	0.9884	0.8681	0.7858	0.9908	0.6425	0.9849	0.7354	0.9764	1	0.8057	0.9915	0.9572	0.9184	0.6354	0.9543	0.941	0.9282	0.7266	0.9063	0.3223	0.0121	0.9879	0.5846	0.4484	0.5391	0.9266	0.3386	0.5283	0.4717	0.8427	0.2895	0.9499	0.9717	0.4249	0.9771	0.6008	1	0.8543	0.4586	0.9823
TCGA-UB-A7MF	214	1	0.9647	0.9032	0.0539	0.9695	0.4992	0.9831	0.9878	0.9829	0.7016	0.8302	0.9851	0.7631	0.99	0.6615	0.9865	0.8929	0.6095	0.9041	0.9194	0.9617	0.5407	0.8498	0.9389	0.8953	0.7878	0.944	0.3134	0.1123	0.8877	0.8104	0.1891	0.7096	0.942	0.3425	0.4803	0.5197	0.8777	0.1525	0.7057	0.5311	0.6799	0.9638	0.3681	0.977	0.8214	0.5749	0.9696
TCGA-DD-A1EE	349	1	0.9717	0.9792	0.0372	0.9957	0.8651	0.988	0.996	0.9803	1	0.9485	0.985	0.8184	0.9894	0.4809	0.982	1	0.7674	1	0.9365	0.99	0.9218	0.9034	0.9279	0.981	0.9048	0.9714	0.6398	0.0781	0.9219	0.7181	0.0698	0.7133	0.9634	0.2912	0.5809	0.4191	0.7803	0.4741	0.7927	0.983	0.7447	0.9904	0.439	0.9893	0.8702	0.7089	0.9745
TCGA-UB-A7MC	500	0	0.9822	0.9839	0.0323	0.9787	0.8322	0.9663	1	0.9775	0.9079	0.9715	0.9873	0.8448	0.95	0.7308	0.9658	1	0.781	0.9783	0.9315	0.9509	0.9273	0.9493	0.9613	0.9475	0.886	0.9372	0.6198	0.0716	0.9284	0.4024	0.2607	0.6122	0.9608	0.3072	0.6391	0.3609	0.7522	0.4852	0.8892	0.9063	0.7432	0.9373	0.6584	0.9956	0.9144	0.7291	0.9153
TCGA-ED-A8O5	406	0	0.9481	0.9457	0.0544	0.9042	0.8672	0.9784	0.9942	0.9878	0.9593	0.7853	1	0.801	1	0.7731	0.9909	1	0.9185	0.9851	0.9232	0.9648	0.9513	1	0.9344	0.9526	0.9167	0.9796	0.7538	0.0234	0.9766	0.5894	0.1692	0.6853	0.97	0.3807	0.5053	0.4947	0.9388	0.4962	0.7893	0.5705	0.4879	0.9286	0.3686	1	0.9381	0.6369	0.97
TCGA-ES-A2HS	688	1	0.9716	0.9568	0.0219	0.8444	0.8093	0.9921	0.998	0.9484	0.77726	0.9281	0.9893	0.781	1	0.58684	0.9914	1	0.8057	0.9826	0.9821	0.993	0.8833	0.8683	0.8852	0.9385	0.6969	1	0.5882	0.0259	0.9741	0.6657	0.0909	0.6125	0.9788	0.618	0.3496	0.6504	0.7992	0.2373	0.79559	0.9835	0.7222	1	0.3778	1	0.9446	0.583	0.9957
TCGA-RC-A7SF	579	0	0.9865	0.9601	0.0354	0.9421	0.7489	0.9877	0.9889	0.9925	0.9075	0.9189	0.9756	0.7899	1	0.3767	0.9888	1	0.8018	0.9959	0.943	0.9826	0.9187	0.8762	0.9222	0.9651	0.898	0.9746	0.4331	0.0498	0.9502	0.3961	0.0529	0.6203	0.9632	0.5849	0.5821	0.4179	0.9036	0.1553	0.9504	0.883	0.7885	0.9674	0.6707	1	0.8447	0.662	0.9838
TCGA-G3-AAV2	372	0	0.9853	0.9884	0.051	0.9306	0.6843	0.9932	0.9891	0.9978	1	0.985	0.9887	0.791	1	0.65	0.9857	1	0.6742	0.9984	0.9918	0.9771	0.8576	0.9469	0.9537	0.9584	0.7225	0.9795	0.5238	0.0315	0.9685	0.2423	0.0846	0.6605	0.8735	0.2451	0.1199	0.8801	0.9035	0.3201	0.8457	0.9737	0.8164	0.9843	0.6436	0.9949	0.9206	0.7797	0.9772
TCGA-DD-AADG	1145	0	0.9951	0.9938	0.0355	0.9721	0.8565	0.9921	0.996	0.9856	0.9739	0.9943	1	0.8251	0.9842	0.6481	0.9974	1	0.7834	1	0.9931	0.9835	0.9659	1	0.9191	0.9886	0.9244	0.9715	0.7172	0.0426	0.9574	0.3893	0.126	0.6812	1	0.1911	0.1395	0.8605	0.8983	0.4327	0.849	0.9473	0.9224	0.9877	0.489	0.9958	0.9202	0.834	0.995
TCGA-ZP-A9D2	743	0	0.9006	0.9681	0.0853	0.9867	0.3994	0.9486	0.9731	0.9899	0.9556	0.9591	0.9811	0.6812	0.9962	0.3005	0.9846	1	0.4968	0.9842	0.8955	0.9669	0.5085	0.8246	0.9076	0.9348	0.7937	0.9675	0.196	0.0372	0.9628	0.7476	0.138	0.55	0.9872	0.3137	0.6025	0.3975	0.8194	0.0336	0.9224	0.4552	0.4052	0.9609	0.629	0.9928	0.8722	0.4826	0.9567
TCGA-BC-A10Z	34	1	0.9755	0.946	0.0774	0.9619	0.643	0.98	0.9991	0.9748	0.8615	0.9515	0.9931	0.8362	0.9766	0.7844	0.9823	1	0.6416	0.987	0.9535	0.9658	0.9192	0.9511	0.9397	0.9652	0.8919	0.908	0.2936	0.0443	0.9557	0.6058	0.2096	0.6192	0.9888	0.2679	0.367	0.633	0.7155	0.3264	0.8527	0.9184	0.7735	0.9152	0.5021	0.9956	0.8014	0.5466	0.9701
TCGA-2Y-A9H2	1731	0	0.9742	0.989	0.0754	0.9822	0.8181	0.977	0.9874	0.9869	0.8986	0.9729	1	0.7918	0.9465	0.5387	0.9642	1	0.7085	1	0.949	0.9202	0.7334	1	0.9741	0.9722	0.9512	0.9589	0.7367	0.1154	0.8846	0.807	0.0905	0.6533	0.9607	0.3426	0.3957	0.6043	0.9473	0.4721	0.702	0.4504	0.6664	0.9056	0.7754	0.9882	0.9286	0.6493	0.9533
TCGA-DD-AAEH	784	0	0.9861	0.9929	0.0346	1	0.9083	0.9954	1	0.9953	0.9383	0.9853	0.9793	0.8656	1	0.8243	0.9869	1	0.9195	0.9909	0.9865	0.9534	1	0.8512	0.9746	0.9525	0.8401	1	0.7963	0.0225	0.9775	0.6807	0.1176	0.5782	1	0.2434	0.4983	0.5017	0.81282	0.4073	0.9168	0.962	0.8285	0.9854	0.5991	1	0.9246	0.7877	0.9872
TCGA-DD-AAE7	644	0	0.9848	0.9522	0.0361	0.9517	0.842289	0.9738	0.9678	1	0.7769	0.8757	0.9933	0.8502	1	0.8522	0.9648	1	0.8199	0.987	0.951	0.9816	0.8027	0.9671	0.9247	0.9527	0.9388	0.9795	0.8473	0.103	0.897	0.3024	0.0582	0.5272	0.9856	0.1037	0.0537	0.9463	0.7867	0.7083	0.9081	0.9438	0.8264	0.9852	0.5387	1	0.9777	0.875	0.9692
TCGA-DD-AAW3	1633	0	0.9927	0.9926	0.0441	0.877	0.8113	0.9844	0.9452	1	0.93	0.9678	1	0.7264	0.9902	0.6717	0.9851	1	0.7052	0.9836	0.9767	0.9857	0.9106	1	0.9934	0.9361	0.7162	0.9812	0.6795	0.0161	0.9839	0.6415	0.1468	0.5515	1	0.2573	0.242	0.758	0.805	0.4985	0.8376	0.9839	0.9394	0.9649	0.5812	0.9784	0.8648	0.8543	0.9633
TCGA-YA-A8S7	412	1	0.9227	0.888	0.1275	0.9121	0.4293	0.9777	0.7238	0.9534	0.7448	0.7926	0.9734	0.6275	1	0.1876	0.9738	1	0.6692	0.9466	0.8038	0.9768	0.6024	0.7052	0.8766	0.962	0.7001	0.8748	0.1125	0.0357	0.9643	0.8693	0.3254	0.7185	0.8148	0.3693	0.8709	0.1291	0.4681	0.1271	0.8852	0.1809	0.4951	0.9199	0.3857	1	0.8122	0.4932	0.9582
TCGA-G3-AAV7	361	0	0.7199	0.67	0.1786	0.7955	0.4375	0.8774	0.9794	0.9608	0.8636	0.7075	0.9838	0.8215	0.9432	0.3401	0.9791	1	0.5925	0.9652	0.6364	0.9492	0.1698	0.8187	0.7981	0.965	0.7568	0.9462	0.2415	0.0995	0.9005	0.8395	0.4363	0.818	0.9673	0.4471	0.8634	0.1365	0.547	0.0655	0.7869	0.2761	0.2089	0.9822	0.3115	1	0.7165	0.4633	0.9843
TCGA-LG-A9QD	366	0	0.9971	0.9955	0.0241	0.9243	0.9041	0.999	0.9889	1	0.953	0.989	1	0.8166	1	0.8558	0.9944	1	0.9163	1	1	0.9737	0.8732	1	0.9558	0.9531	0.8851	1	0.7575	0.041	0.959	0.4791	0.0147	0.4497	1	0.1998	0.2131	0.7869	0.8363	0.5971	0.874	0.9675	0.9531	0.963	0.6406	1	0.9772	0.9148	0.972
TCGA-DD-A11A	79	0	0.9124	0.9663	0.0418	0.926	0.5896	0.9646	0.9962	0.9822	0.8458	0.9148	0.969	0.882	0.9869	0.5503	0.9872	1	0.4912	1	0.9279	0.971	0.9049	0.7163	0.9494	0.9612	0.8633	0.968	0.3178	0.0955	0.9045	0.7015	0.0837	0.7615	0.9528	0.5104	0.112	0.888	0.6886	0.0971	0.7036	0.9392	0.4678	0.9197	0.6165	1	0.7746	0.5623	0.9512
TCGA-DD-AADU	554	0	0.9388	0.9791	0.0256	0.9175	0.7974	0.9925	0.9916	0.9822	1	0.9734	1	0.6652	1	0.6331	0.9838	1	0.6613	0.998	0.9739	0.9893	0.8754	1	0.9241	0.966	0.9056	1	0.566	0.0542	0.9458	0.3614	0.1552	0.4883	0.9276	0.0414	0.0329	0.9671	0.8287	0.3759	0.81949	0.9368	0.471	0.9084	0.7569	1	0.903	0.7721	0.9701
TCGA-DD-AADW	587	0	0.8897	0.8849	0.1237	0.9282	0.1641	0.9612	0.9959	0.981	0.9397	0.7148	0.9898	0.7789	0.9832	0.6401	0.9879	1	0.5295	0.9965	0.9429	0.9447	0.7991	0.9382	0.9286	0.9754	0.7761	0.8824	0.2148	0.0437	0.9563	0.6165	0.1849	0.7326	0.9658	0.3056	0.7122	0.2878	0.8405	0.1431	0.782	0.3507	0.4254	0.8736	0.6752	0.9939	0.894	0.3041	0.9481
TCGA-CC-A8HU	344	1	0.7897	0.7503	0.2886	0.8363	0.3309	0.9632	0.9945	0.985	0.9394	0.6114	0.9893	0.8302	0.9603	0.4274	0.9823	1	0.5783	0.9632	0.6604	0.9565	0.6973	0.9051	0.9019	0.904	0.7545	0.9342	0.2007	0.0402	0.9598	0.6858	0.2581	0.7739	0.9589	0.5238	0.8782	0.1218	0.5608	0.1414	0.849	0.8078	0.2806	0.9482	0.2157	1	0.8297	0.6722	0.9688
TCGA-2Y-A9GV	2532	1	0.9886	1	0.0455	0.9707	0.808	0.9937	0.9728	1	0.8665	1	1	0.7442	0.9938	0.7583	0.9849	1	0.7227	0.9923	0.9617	0.9703	1	1	0.9798	0.9469	0.7987	0.9529	0.5176	0.0321	0.9679	0.6968	0.1391	0.4997	0.9852	0.2829	0.2618	0.7382	0.852	0.4217	0.9576	0.9713	0.8861	0.9071	0.6548	1	0.8725	0.7956	0.9656
TCGA-EP-A26S	237	0	0.9937	0.9955	0.0317	0.9032	0.854	0.9909	0.9986	0.9943	0.9728	0.9931	0.9963	0.8019	0.985	0.7696	0.9952	1	0.8299	0.9952	0.9503	0.9922	0.812	0.9767	0.9548	0.9511	0.9488	0.9843	0.6182	0.0465	0.9535	0.5477	0.0914	0.7769	0.9663	0.2162	0.221	0.779	0.6311	0.5402	0.8371	0.9871	0.9609	0.9879	0.2873	0.9934	0.9621	0.9232	0.9894
TCGA-2Y-A9H9	697	0	0.966	0.9494	0.0661	0.9751	0.757	0.9914	0.9951	1	0.9763	0.9409	0.9864	0.7699	1	0.7222	0.9949	1	0.6043	0.9824	0.9545	0.9711	0.8405	0.9076	0.902	0.969	0.8092	0.9513	0.5836	0.0404	0.9596	0.4875	0.1221	0.6486	0.9801	0.3294	0.0838	0.9162	0.7807	0.4356	0.8423	0.9406	0.5534	0.8828	0.7304	0.991	0.8978	0.5673	0.9653
TCGA-XR-A8TG	898	0	0.9671	0.9552	0.0653	0.8885	0.8448	0.9869	0.9311	0.9644	0.8964	0.9188	0.992	0.8237	1	0.6378	0.9775	1	0.8795	0.9745	0.94	0.9777	0.7317	0.9659	0.9148	0.9745	0.8322	0.9533	0.6319	0.0289	0.9711	0.6981	0.2572	0.6808	0.9915	0.3593	0.6457	0.3543	0.7658	0.4212	0.8644	0.8417	0.5468	0.9279	0.744	1	0.9127	0.6338	0.9645
TCGA-DD-A73F	1085	0	0.9826	0.9585	0.036	0.9546	0.8161	0.9944	0.9886	1	0.9232	0.939	1	0.6861	1	0.7265	0.9834	1	0.8712	0.9907	0.9494	0.9638	0.7963	1	0.8788	0.9634	0.8105	0.9851	0.5853	0.0518	0.9482	0.4838	0.1393	0.6862	0.9714	0.31	0.2499	0.7501	0.7922	0.3641	0.8346	0.9278	0.7809	0.9724	0.5107	0.9932	0.8372	0.5747	0.9882
TCGA-DD-A39W	827	1	0.9854	0.9812	0.0148	0.9282	0.7884	0.9948	0.9971	0.9892	1	0.9648	1	0.7972	0.9948	0.2569	0.9935	1	0.7261	0.9872	0.951	0.9911	0.9646	1	0.9297	0.9589	0.8838	0.9245	0.4322	0.0657	0.9343	0.5849	0.0689	0.6544	1	0.2967	0.1939	0.8061	0.7946	0.2193	0.8068	0.8464	0.8224	0.9472	0.7054	0.9949	0.9018	0.7304	0.9854
TCGA-G3-AAUZ	480	0	0.9823	0.9444	0.0233	0.8305	0.6858	0.9952	0.9962	0.9902	0.8484	0.9523	0.9918	0.789	0.9757	0.5363	0.9832	1	0.7536	0.9838	0.9605	0.9935	0.8437	0.9178	0.8532	0.9662	0.8757	0.904	0.5216	0.034	0.966	0.5679	0.137	0.5577	0.9752	0.3014	0.6651	0.3349	0.8914	0.1279	0.8281	0.8729	0.7885	0.922	0.8333	1	0.8611	0.6977	0.9898
TCGA-G3-A25T	1553	0	0.9831	0.9978	0.0324	0.923	0.773	0.9696	0.9948	0.9967	0.6753	0.9894	0.9981	0.9373	0.991	0.65	0.9931	1	0.8999	1	0.984	0.9597	0.875889	0.9872	0.9924	0.9747	0.8679	0.978	0.8347	0.0385	0.9615	0.5566	0.0458	0.7282	0.9257	0.3976	0.5015	0.4985	0.8691	0.228233	1	0.3312	0.7448	0.9649	0.767	1	0.9751	0.8428	0.9625
TCGA-ED-A82E	408	0	0.9899	0.9972	0.0302	0.8507	0.8588	0.9985	0.9996	0.9953	0.9782	0.9888	1	0.8191	1	0.3687	0.9923	1	0.8731	0.995	0.9922	0.9677	0.7541	1	0.9787	0.9681	0.9047	0.9698	0.7643	0.0891	0.9109	0.5341	0.0451	0.7719	0.9799	0.5017	0.1629	0.8371	0.9159	0.2391	0.7385	0.198	0.7304	0.953	0.7658	1	0.9869	0.8533	0.9748
TCGA-FV-A3I0	848	0	0.9732	0.9921	0.0712	0.9355	0.7206	0.9881	0.9839	0.9944	0.9172	0.9585	0.9968	0.9539	1	0.198	0.9936	0.976	0.7125	0.9874	0.8647	0.965	0.8219	0.9427	0.9948	0.9521	0.8995	0.9599	0.5078	0.0965	0.9035	0.5237	0.1158	0.6942	0.9658	0.5599	0.3824	0.6176	0.8387	0.260889	1	0.2619	0.6694	0.9512	0.7668	0.9932	0.926	0.755	0.9946
TCGA-DD-AADK	1049	0	0.9317	0.9838	0.0548	0.9465	0.7143	0.9564	0.9541	0.9782	0.8783	0.8487	0.9815	0.8938	1	0.478	0.996	1	0.5528	0.9897	0.8287	0.9498	0.6239	0.8403	0.9975	0.9633	0.7493	0.9852	0.4312	0.0597	0.9403	0.6439	0.1057	0.536	0.9611	0.4664	0.6403	0.3597	0.7542	0.084	0.7644	0.9157	0.5703	0.9856	0.6456	1	0.7999	0.5258	0.9874
TCGA-CC-A7IF	649	1	0.969	0.9626	0.0399	0.9797	0.8155	0.9953	0.9981	0.9874	0.9668	0.9489	0.9841	0.7104	0.9921	0.6534	0.9976	1	0.742	0.9892	0.9685	0.8368	0.8654	0.9319	0.9129	0.9449	0.8828	0.9451	0.7035	0.0473	0.9527	0.691	0.1638	0.6286	0.9606	0.3381	0.4039	0.5961	0.9368	0.4288	0.9166	0.8963	0.6712	0.951	0.7708	0.9794	0.9223	0.6942	0.9834
TCGA-UB-A7MB	601	0	0.9811	0.9673	0.0571	0.9017	0.5239	0.9946	1	0.9846	0.9223	0.9383	0.9832	0.8138	1	0.542	1	1	0.826	1	0.9737	0.9521	0.8521	0.8794	0.9469	0.9776	0.7166	0.6116	0.2976	0.0462	0.9538	0.7265	0.3143	0.7082	0.9923	0.2797	0.7142	0.2858	0.7315	0.3579	0.7588	0.6978	0.7251	0.9527	0.6232	1	0.8517	0.4807	0.9643
TCGA-5R-AA1D	337	0	0.9896	0.9863	0.0276	0.9686	0.8444	0.9974	0.91	0.989	0.8379	0.9634	1	0.78827	1	0.6923	0.9832	1	0.814	1	0.9958	0.9724	0.8004	1	0.9752	0.9275	0.8834	0.956	0.6089	0.0316	0.9684	0.318	0.0811	0.5418	0.9751	0.2753	0.7219	0.2781	0.8868	0.1793	1	0.8059	0.7877	0.9355	0.5868	1	0.9798	0.7845	0.9774
TCGA-FV-A3I1	247	1	0.9189	0.7045	0.0702	0.9505	0.9237	0.9421	0.9892	0.9659	0.8719	0.7011	0.9054	0.6807	0.9974	0.7527	0.9898	1	0.6852	0.9917	0.8464	0.9708	0.9307	0.5697	0.8307	0.941	0.7702	0.9876	0.7637	0.0907	0.9093	0.7937	0.1095	0.7363	0.9612	0.374	0.8025	0.1975	0.689	0.3394	0.7084	0.3279	0.5543	0.9644	0.3579	1	0.878	0.5181	0.9878
TCGA-DD-A4NG	802	1	0.8931	0.9853	0.0841	0.9697	0.8904	0.9775	0.9955	0.978	0.8802	0.8638	0.9855	0.6127	1	0.6706	1	1	0.9089	0.9799	0.963	0.9557	0.7589	0.917	0.9399	0.9349	0.6929	0.9539	0.7594	0.0267	0.9733	0.6804	0.1304	0.5787	1	0.2339	0.6864	0.3136	0.9405	0.4425	0.604	0.8734	0.4095	0.976	0.4928	1	0.9153	0.783	0.9747
TCGA-NI-A8LF	606	0	0.9764	0.9673	0.0598	0.9647	0.7242	0.991	0.9849	0.9907	0.9383	0.9387	0.9944	0.872	0.9709	0.5471	0.979	1	0.9324	0.9852	0.9279	0.9692	0.9372	0.9566	0.9311	0.9595	0.7821	1	0.4514	0.061	0.939	0.767	0.1083	0.6664	0.9924	0.2876	0.2094	0.7906	0.83	0.2177	0.8371	0.9722	0.7206	0.9205	0.6346	1	0.8218	0.7829	0.9833
TCGA-DD-A1EJ	1005	1	0.8769	0.7713	0.0661	0.9311	0.6201	0.9579	0.9972	0.992	0.9716	0.7872	0.9898	0.8687	0.9967	0.482	0.9866	1	0.5996	0.961	0.8814	0.8975	0.8907	0.9286	0.8452	0.9512	0.8607	0.9224	0.3166	0.0378	0.9622	0.582	0.1804	0.8424	0.9672	0.2648	0.7286	0.2714	0.7962	0.2228	0.7622	0.7739	0.3482	0.9549	0.37	0.9889	0.8415	0.4207	0.9895
TCGA-DD-A115	2542	1	0.9165	0.9352	0.0385	0.7795	0.8738	0.9767	0.9969	0.9838	0.9427	0.9302	0.9965	0.789	1	0.5874	0.9903	1	0.8864	0.9944	0.9415	0.9713	0.7046	0.947	0.8586	0.9757	0.843	0.9695	0.7255	0.0896	0.9104	0.3236	0.1064	0.6788	0.9464	0.5092	0.2139	0.7861	0.8759	0.5994	0.9616	0.8867	0.2823	0.9534	0.6783	0.9682	0.9622	0.6857	0.9735
TCGA-ZS-A9CF	2412	0	0.9783	0.9613	0.0643	0.9646	0.8158	0.9764	0.9975	0.987	0.8189	0.9456	1	0.7368	0.9796	0.6825	0.964	1	0.8105	0.9891	0.9447	0.9541	0.8126	1	0.9187	0.9369	0.8565	0.9911	0.6081	0.0299	0.9701	0.6509	0.246	0.4397	0.9824	0.2986	0.4463	0.5537	0.4982	0.4386	0.8158	0.9812	0.8398	0.986	0.6142	0.9884	0.8937	0.7986	0.9433
TCGA-DD-A73B	283	1	0.9697	0.9423	0.0196	0.9972	0.8122	0.9944	0.9992	0.9878	0.9311	0.916	0.9697	0.7574	1	0.706	0.988	1	0.8661	0.9783	0.9692	0.983	0.6797	0.6315	0.825	0.9455	0.8931	0.9872	0.6385	0.0161	0.9839	0.3762	0.232	0.5013	1	0.3658	0.6651	0.3349	0.7125	0.2762	0.7935	0.9889	0.6466	0.9572	0.7217	1	0.9067	0.7483	0.9553
TCGA-DD-A1EL	415	1	0.6419	0.5469	0.105	0.9923	0.013	0.9174	0.9965	0.9061	0.6431	0.5207	0.951	0.4047	0.972	0.2477	0.9008	1	0.171	0.9441	0.7064	0.964	0.9	0.6042	0.7311	0.8637	0.6682	0.9654	0.0029	0.0392	0.9608	0.546	0.3183	0.8705	0.9363	0.3139	0.8325	0.1675	0.5048	0.0254	0.743	0.5659	0.2026	0.9236	0.3176	0.929	0.4617	0.3842	0.9126
TCGA-G3-A7M9	56	1	0.6887	0.7487	0.0764	0.686	0.3599	0.8841	0.7774	0.9477	0.546	0.5972	0.9669	0.5748	0.9612	0.2378	0.9642	1	0.6459	0.7622	0.7579	0.8943	0.1936	0.83	0.8524	0.9218	0.6622	0.9364	0.2078	0.049	0.951	0.7392	0.5308	0.8618	0.8503	0.5569	0.8097	0.1903	0.6473	0.1234	0.7229	0.1687	0.156	0.8422	0.418	0.9387	0.7303	0.5098	0.9151
TCGA-G3-A7M7	361	0	0.9782	0.9472	0.025	0.9776	0.8475	0.9874	0.9888	0.9851	0.95	0.9205	0.995	0.7213	0.9921	0.7782	1	1	0.7992	0.9849	0.9448	0.9885	0.8847	0.9587	0.9367	0.9579	0.7794	0.9827	0.5676	0.0554	0.9446	0.494	0.0506	0.495	0.9597	0.3059	0.3514	0.6486	0.7807	0.1688	0.7024	0.6208	0.7405	0.968	0.5381	0.9629	0.8605	0.746	0.9799
TCGA-CC-5262	103	1	0.8729	0.7633	0.0582	0.8291	0.373	0.9722	0.8635	0.9862	0.9225	0.6231	0.9701	0.7632	1	0.5556	0.9796	1	0.4792	0.9972	0.9142	0.983	0.9159	0.4521	0.9236	0.9364	0.7601	0.9663	0.2796	0.052	0.948	0.9159	0.133	0.659	0.9843	0.3756	0.9435	0.0565	0.3294	0.0601	0.6651	0.7244	0.259	0.878	0.4563	1	0.8448	0.384	0.9358
TCGA-BC-A110	2116	1	0.9884	0.9777	0.0423	0.9464	0.9073	0.9857	0.9156	1	0.8917	0.9646	1	0.806	1	0.7901	0.9886	1	0.724	1	0.9568	0.9907	0.9449	1	1	0.952	0.7596	0.9755	0.7726	0.0422	0.9578	0.7025	0.2278	0.5853	1	0.2797	0.0573	0.9427	1	0.6954	0.8808	0.751	0.8549	1	0.7413	1	0.8666	0.7616	0.9904
TCGA-DD-AACZ	171	1	0.6046	0.6707	0.1421	0.9322	0.2677	0.9451	0.9897	0.9689	0.5728	0.5426	0.9218	0.588	0.9468	0.7562	0.9872	1	0.5286	0.9284	0.7784	0.8742	0.6906	0.677	0.8646	0.9254	0.8106	0.9644	0.3214	0.0785	0.9215	0.5732	0.1194	0.722	0.8406	0.2273	0.824	0.176	0.565	0.1732	0.5856	0.5468	0.1719	0.9407	0.5736	1	0.7791	0.3833	0.9277
TCGA-WJ-A86L	345	0	0.802	0.6167	0.1263	0.9165	0.2096	0.9615	0.9893	0.9892	0.8917	0.6163	0.9794	0.5133	1	0.4431	0.995	1	0.5817	0.9855	0.8012	0.97	0.8084	0.8917	0.8248	0.9637	0.7184	0.99	0.175	0.037	0.963	0.8186	0.1655	0.4915	0.9206	0.1924	0.5478	0.4522	0.8134	0.1203	0.6741	0.8535	0.1689	0.9172	0.5116	0.9539	0.8281	0.3711	0.9642
TCGA-G3-A7M5	447	0	0.988	0.9727	0.0421	0.9413	0.80677	0.9837	0.9986	1	1	0.9581	0.9828	0.8127	0.9907	0.875	0.9955	1	0.8735	0.9977	0.9475	0.8729	0.9396	0.8418	0.934	0.9864	0.8973	1	0.8675	0.014	0.986	0.5439	0.0248	0.6294	0.9127	0.2517	0.0554	0.9446	0.9132	0.6371	0.9089	0.9814	0.8471	0.954	0.4912	1	0.9064	0.7306	0.9816
TCGA-G3-A25U	1636	0	0.9651	0.9918	0.0273	0.9309	0.6561	0.991	0.9982	0.9836	0.9739	0.9916	1	0.8842	0.9922	0.6105	0.9802	1	0.6705	0.9895	0.9899	0.9355	0.9477	1	0.9114	0.968	0.7772	0.9849	0.3969	0.0457	0.9543	0.6001	0.3604	0.5171	1	0.6383	0.4362	0.5638	0.7741	0.6077	0.8992	0.9257	0.6614	0.9398	0.5915	1	0.7887	0.6981	0.9341
TCGA-EP-A2KB	334	0	0.9634	0.9222	0.0299	0.8279	0.8133	0.9749	0.9988	0.9907	0.9193	0.8328	0.9937	0.7801	0.9838	0.7848	0.9893	1	0.8531	0.9783	0.9078	0.9613	0.8771	0.961	0.907	0.9541	0.8612	0.961	0.569	0.0255	0.9745	0.4851	0.1704	0.6033	0.9603	0.3056	0.7133	0.2867	0.6992	0.2806	0.9204	0.931	0.4963	0.946	0.2498	1	0.9129	0.6743	0.955
TCGA-DD-A4NE	660	1	0.9866	0.9558	0.0239	0.9554	0.8953	0.9922	0.9969	0.9916	0.9776	0.9462	0.981	0.8138	1	0.6147	0.981	1	0.8567	1	0.9687	0.9734	0.898	0.9228	0.9129	0.9735	0.8488	0.812	0.7824	0.0411	0.9589	0.6008	0.1374	0.6119	0.9559	0.3216	0.7024	0.2976	0.8092	0.5797	0.9095	0.8389	0.8229	0.9639	0.5511	1	0.891	0.6891	0.9336
TCGA-RC-A7SK	472	0	0.9893	0.9631	0.0496	0.9883	0.81095	0.985	0.9984	0.9869	0.9739	0.9624	0.994	0.8048	1	0.7108	0.9964	1	0.8315	1	0.9548	0.9495	0.8576	0.9661	0.9592	0.9267	0.8834	0.9906	0.887	0.0271	0.9729	0.4306	0.0768	0.7112	1	0.3707	0.446	0.554	0.8448	0.5172	0.8409	0.8641	0.8642	0.9613	0.772	1	0.8999	0.7298	0.9903
TCGA-2Y-A9H7	1168	0	0.9059	0.9117	0.0537	0.9487	0.2987	0.9856	1	0.9974	0.9488	0.8466	0.9977	0.5401	0.9851	0.5678	0.9956	1	0.6755	0.9686	0.9333	0.8489	0.9217	0.9866	0.8472	0.9732	0.9047	0.9754	0.2073	0.0434	0.9566	0.6102	0.0813	0.6888	0.9771	0.2816	0.3107	0.6893	0.8638	0.0746	0.791	0.9188	0.3267	0.9155	0.7558	0.9808	0.9109	0.293	0.9718
TCGA-4R-AA8I	262	1	0.9554	0.9578	0.0666	0.9064	0.7032	0.9766	0.9254	0.9961	0.9653	0.9394	0.9845	0.6716	0.9901	0.4141	0.9656	0.8929	0.8644	0.9873	0.9657	0.9839	0.9534	0.9498	0.9652	0.9823	0.8572	0.9747	0.3524	0.0445	0.9555	0.6994	0.1152	0.7001	0.9492	0.5037	0.2959	0.7041	0.8125	0.2738	0.7996	0.8748	0.5942	0.9282	0.5856	1	0.83	0.7025	0.9662
TCGA-UB-A7ME	486	0	0.9323	0.843	0.0539	0.9849	0.7108	0.9786	0.9891	0.9591	0.8422	0.7541	0.9754	0.671	0.9849	0.7202	0.9873	1	0.5496	0.9814	0.9004	0.9798	0.9034	0.8004	0.854	0.9141	0.7538	0.9843	0.4651	0.0402	0.9598	0.7069	0.1939	0.6167	0.9572	0.2553	0.6619	0.3381	0.7126	0.2521	0.7861	0.6082	0.5548	0.9755	0.5215	0.9923	0.7449	0.5173	0.9764
TCGA-ED-A627	423	0	0.9859	0.983	0.0479	0.9229	0.8799	0.9871	0.9859	0.9888	0.9776	0.964	1	0.9235	0.9828	0.7304	0.9895	1	0.8727	1	0.972	0.9501	0.9192	1	0.9783	0.9403	0.8286	0.9866	0.712	0.0508	0.9492	0.5452	0.2164	0.5651	0.9946	0.353	0.1579	0.8421	0.9025	0.4027	0.8993	0.6892	0.7626	0.9726	0.7732	1	0.8741	0.8833	0.9869
TCGA-DD-AAVR	2513	0	0.9884	0.9953	0.0299	0.8509	0.9234	0.9912	0.9966	0.994	0.9193	0.9902	0.988	0.8177	0.9927	0.7018	0.9935	1	0.8218	0.9923	0.954	0.9481	0.8068	0.915	0.9579	0.9852	0.8906	0.9554	0.7806	0.065	0.935	0.5714	0.0779	0.5642	0.9682	0.1712	0.5656	0.4344	0.9141	0.6686	0.8281	0.9163	0.7743	0.961	0.6335	1	0.9622	0.8976	0.9521
TCGA-G3-A5SK	744	0	0.9916	0.9866	0.0627	0.9248	0.9074	0.998	0.9946	1	1	0.9831	1	0.9033	0.9864	0.7545	0.9889	1	0.7203	1	0.9808	0.9883	0.7549	1	0.9163	0.9628	0.9143	0.9726	0.787	0.0357	0.9643	0.5655	0.1213	0.4837	1	0.2063	0.0402	0.9598	0.9386	0.7532	1	0.9918	0.8878	0.8874	0.7103	1	0.8899	0.8243	0.9534
TCGA-DD-A11D	1560	1	0.992	1	0.0272	0.8981	0.8702	0.9985	0.9977	1	1	1	1	0.8895	1	0.705	0.9935	1	0.8788	0.9919	0.9778	0.9914	0.8791	1	0.9486	1	0.9312	0.9839	0.7322	0.0249	0.9751	0.6008	0.0852	0.6108	0.9713	0.1478	0	1	0.9641	0.6055	0.9541	0.9343	0.8867	0.9423	0.7924	1	0.9655	0.92	0.982
TCGA-CC-5264	102	1	0.8853	0.8608	0.1654	0.7891	0.3209	0.9202	0.9929	0.9756	0.7987	0.7229	0.9873	0.6901	0.8993	0.8118	0.9735	1	0.5826	0.9819	0.8255	0.9371	0.313	0.8472	0.926	0.9448	0.7135	0.9716	0.1519	0.0346	0.9654	0.7495	0.3043	0.7536	0.9317	0.4985	0.8971	0.1029	0.2153	0.1541	0.7306	0.7094	0.4853	0.8871	0.395	0.9796	0.8133	0.5147	0.9109
TCGA-DD-AACN	1302	0	0.9671	0.9348	0.0644	0.8708	0.6093	0.9743	0.9724	0.9869	0.93	0.8349	0.9952	0.7286	0.9868	0.7359	0.9835	1	0.5995	1	0.9096	0.9867	0.9288	0.969	0.8786	0.9729	0.8638	0.9643	0.3322	0.0277	0.9723	0.4038	0.2121	0.5786	0.9763	0.2576	0.1319	0.8681	0.8472	0.1806	0.8232	0.5188	0.6601	0.9522	0.6055	1	0.9057	0.6444	0.9633
TCGA-DD-AAVY	1970	0	0.9838	1	0.0321	1	0.8495	0.9901	1	0.9882	1	1	1	0.8706	1	0.7034	0.9943	1	0.769	1	0.9559	0.9876	0.9589	1	0.9706	0.9632	0.8366	1	0.5987	0.0481	0.9519	0.4206	0.0516	0.6726	1	0.0921	0.1019	0.8981	0.7486	0.4936	0.8892	0.9865	0.8434	0.9777	0.5401	1	0.8928	0.7477	0.9874
TCGA-DD-AADY	555	0	0.9557	0.9624	0.0443	0.9409	0.4064	0.9529	0.9983	0.98	0.9716	0.9319	0.9902	0.7257	0.9711	0.8836	0.991	1	0.4644	1	0.8965	0.9677	0.9217	0.9004	0.8885	0.9892	0.8597	0.9799	0.2938	0.0411	0.9589	0.7268	0.1494	0.6741	0.9546	0.3583	0.1956	0.8044	0.8634	0.3418	0.7184	0.8783	0.6124	0.9093	0.4194	1	0.8505	0.4475	0.9631
TCGA-2Y-A9H6	357	0	0.9884	0.9959	0.0356	0.9644	0.9091	0.9905	0.9883	0.9957	0.93	0.9703	0.9956	0.8118	0.9931	0.8219	1	1	0.7166	1	0.973	0.9602	0.7532	0.9819	0.9777	0.9728	0.8842	0.955	0.8019	0.1045	0.8955	0.4433	0.0841	0.4948	0.9764	0.3202	0.2459	0.7541	0.8122	0.2713	0.815	0.9095	0.852	0.9714	0.7441	1	0.9569	0.7485	0.9909
	MEAN	0.348765	0.924353	0.908962	0.0590478	0.922513	0.667331	0.97387	0.975599	0.982306	0.887974	0.860601	0.985884	0.757373	0.988568	0.601501	0.983595	0.997703	0.686399	0.979003	0.907394	0.956367	0.800299	0.890467	0.914596	0.950682	0.821844	0.957744	0.502456	0.052017	0.947984	0.610442	0.157147	0.646776	0.962188	0.33419	0.500471	0.499511	0.79377	0.29184	0.821228	0.783592	0.601075	0.939878	0.552331	0.991537	0.865318	0.63311	0.961922
	SD	0.477317	0.0958405	0.123149	0.0395527	0.0820159	0.239397	0.0282132	0.0534872	0.0172455	0.0983106	0.147318	0.0149762	0.12321	0.0193314	0.176809	0.0137881	0.0137903	0.169014	0.0313999	0.0952975	0.0417016	0.178172	0.135602	0.0640092	0.0323335	0.0869528	0.0443877	0.240847	0.0372499	0.0372501	0.153843	0.0938784	0.0975679	0.0361251	0.115642	0.259986	0.259979	0.132197	0.18162	0.117279	0.235951	0.25009	0.0481184	0.152233	0.0190777	0.0771	0.169889	0.0313167
[truncated: 3,419 more columns]
